# Colicin E1 opens its hinge to plug TolC

**Authors:** S. Jimmy Budiardjo<sup>1</sup>, Jacqueline J. Stevens<sup>2</sup>, Anna L. Calkins<sup>3</sup>, Ayotunde P. Ikujuni<sup>2</sup>, Virangika K. Wimalasena<sup>2</sup>, Emre Firlar<sup>4</sup>, David A. Case<sup>5</sup>, Julie S. Biteen<sup>3</sup>, Jason T. Kaelber<sup>4</sup> and Joanna S.G. Slusky<sup>1,2,\*</sup>

## Affiliations:

<sup>1</sup> Center for Computational Biology, The University of Kansas, 2030 Becker Dr., Lawrence, KS 66047

<sup>2</sup> Department of Molecular Biosciences, The University of Kansas, 1200 Sunnyside Ave. Lawrence KS 66045

<sup>3</sup> Department of Chemistry, University of Michigan, Ann Arbor MI 48109-1055.

<sup>4</sup> Rutgers CryoEM & Nanoimaging Facility and Institute for Quantitative Biomedicine, Rutgers, The State University of New Jersey, Piscataway, NJ 08854, USA

<sup>5</sup> Department of Chemistry and Chemical Biology, Rutgers University, Piscataway, NJ 08854 USA

\*Correspondence: [slusky@ku.edu](mailto:slusky@ku.edu).

## ABSTRACT

The double membrane architecture of Gram-negative bacteria forms a barrier that is effectively impermeable to extracellular threats. Bacteriocin proteins evolved to exploit the accessible, surface-exposed proteins embedded in the outer membrane to deliver cytotoxic cargo. Colicin E1 is a bacteriocin produced by, and lethal to, *Escherichia coli* that hijacks the outer membrane proteins TolC and BtuB to enter the cell. Here we capture the colicin E1 translocation domain inside its membrane receptor, TolC, by high-resolution cryoEM. Colicin E1 binds stably to TolC as an open hinge through the TolC pore—an architectural rearrangement from colicin E1's unbound conformation. This binding is stable in live *E. coli* cells as indicated by single-molecule fluorescence microscopy. Finally, colicin E1 fragments binding to TolC plugs the channel,

29 inhibiting its native efflux function as an antibiotic efflux pump and heightening susceptibility to  
30 four antibiotic classes. In addition to demonstrating that these protein fragments are useful  
31 starting points for developing novel antibiotic potentiators, the known variety of other colicin-  
32 binding partners will allow our method to inhibit other outer membrane protein functions.

33

## 34 INTRODUCTION

35 In Gram-negative bacteria, the concentric structures of the outer membrane, cell wall, and  
36 cytoplasmic membrane protect the cell from extracellular threats. Of these protective structures,  
37 the outer membrane forms a particularly formidable barrier<sup>5</sup>, owing to the impermeability of the  
38 lipopolysaccharide (LPS) layer that constitutes the outer membrane<sup>7</sup>. The primary means by  
39 which external molecules can gain access to the cell is through the ~100 varieties of barrel-  
40 shaped proteins that are embedded in each bacterium outer membrane<sup>8</sup> and whose diverse  
41 functions include the transport of molecules across the membrane—specifically, the import of  
42 nutrients and metabolites and the export of toxins and waste.

43 Because outer membrane proteins (OMPs) are accessible from outside the cell,  
44 bacteriophage and bacterial toxins have evolved to exploit OMPs to initiate delivering cargo  
45 across the outer membrane. Bacteriocins hijack the OMPs of a target bacterium to cross its  
46 impermeable outer membrane and kill the bacterium. Colicins are *E. coli*-specific bacteriocins,  
47 protein toxin systems through which bacteria engage in bacterial warfare with other, similar  
48 bacteria. Although colicins differ in their receptor targets and killing mechanisms, most colicins  
49 share a common tri-domain architecture, comprising the following components: (i) an N-terminal  
50 translocation (T) domain, (ii) a receptor-binding (R) domain, and (iii) a C-terminal cytotoxic (C)  
51 domain (Figure 1A). Much of what is known of *E. coli* colicin import has been determined through  
52 studies of the colicin E3 and E9 as reviewed by Cramer et al.<sup>9</sup> Import is initialized by R domain

53 binding to the vitamin B12 transporter, BtuB, with high affinity<sup>10,11</sup>; this binding localizes the  
54 colicin onto the outer membrane. Once the colicin is tethered to the outer membrane surface, the  
55 T domain initiates translocation using the secondary OMP receptor OmpF to access TolA/Pal  
56 system for group A colicins or the Ton system group B colicins. In most cases, the T domain  
57 requires an OMP distinct from the R domain target.<sup>12</sup> A handful of colicins have been  
58 structurally characterized with their OMP counterparts, although not in their entirety. Previous  
59 structures of short N-terminal fragments of the T domain of ColE9 with OmpF<sup>13</sup> and the The R  
60 domains of ColE2/E3 and Ia with BtuB<sup>11,14</sup> and Cir<sup>10</sup>, respectively showed that T domains fully  
61 penetrate deeply into lumen of the outer membrane receptors while R domains interact with the  
62 extracellular loop regions of their receptors. Studies of the bacteriocin pyocin S5 from  
63 *Pseudomonas aeruginosa* suggest that bacteriocin architectures and mechanisms may be  
64 conserved across all Gram-negative species.

65 Colicin E1 is a bacteriocin secreted by *E. coli* that enters the periplasm of neighboring  
66 cells and forms a pore on the cytoplasmic membrane leading to membrane depolarization and  
67 cell death. Colicin E1 uses TolC, the outer membrane component of the acridine efflux pump, as  
68 the T domain receptor<sup>15</sup> and BtuB as the R domain receptor<sup>16</sup>. A high-resolution x-ray structure  
69 exists of only the cytotoxic domain of colicin E1<sup>17</sup> but not the T or R domains, thus no  
70 mechanistic insights can be gained about initial steps of import. Domain swapping experiments  
71 between colicin A and E1 identified regions of the protein that interact with specific outer  
72 membrane proteins. Early studies of pore forming colicins, including E1, showed that cytotoxic-  
73 domain-induced K<sup>+</sup> efflux on the inner membrane can be reversed after it has begun by  
74 subsequent addition of trypsin to cells. This, in addition to trypsin's inability to cross the outer

75 membrane, led to the belief that portions of colicin remain tethered to their OMP partners as the  
76 cytotoxic domain depolarizes the cytoplasmic membrane.<sup>18-21</sup>

77 In order to understand the early stages of colicin E1 import, functional studies of  
78 truncations of colicin E1 which lack the cytotoxic domain have been characterized *in vitro*.  
79 Residues 100-120 of colicin E1 (termed the ‘TolC box’, Figure 1A) have been shown to be  
80 necessary but not sufficient for binding TolC. Peptides that include the TolC box co-elute with  
81 TolC<sup>22</sup> and disrupt channel conductance<sup>22,23</sup>. Moreover, *E. coli* exposure to TolC-box-containing  
82 peptides can prevent subsequent binding and cytotoxicity of full-length colicin E1<sup>24</sup>. Circular  
83 dichroism of the T domain indicates that it exists as a helical hairpin (closed hinge) in solution  
84 similar to other colicin T domains<sup>25</sup> and that the proline at the center of the TolC box forms its  
85 apex<sup>22</sup>. This measurement led to the proposal, known as the “pillar model,”<sup>22</sup> that the T domain  
86 inserts into the TolC barrel as a helical hairpin where the N and C-termini are pointing to the cell  
87 exterior. According to this model, the hairpin stuck in TolC acts as a buttress to facilitate the  
88 cytotoxic domain entry directly through the membrane.

89 A competing model for colicin E1 import, known as the “total thread” model<sup>9,22</sup>, posits  
90 that the protein unfolds and passes through TolC N-terminus-first as an unstructured peptide,  
91 followed by refolding in the periplasm. In this model the binding between the intrinsically  
92 unstructured colicin N-termini and periplasmic proteins<sup>24,26</sup> creates a pulling force that results in  
93 the translocation of the whole colicin.

94 Here we use cryogenic electron microscopy (cryoEM) to solve the high-resolution  
95 structure of the colicin E1 T domain bound to TolC. We find that colicin E1 binds stably to  
96 TolC, not as a helical hairpin but as a single-pass folded helix with the N-terminus inside the  
97 periplasm. Additionally, we find that the colE1 TR domain binds TolC *in vivo* as well. Using

98 single-molecule fluorescence microscopy, we find that colE1-TR, lacking the cytotoxic domain,  
99 remains stalled on the outer membrane and does not fully translocate into cells. Lastly, we  
100 leverage this stalling of ColE1 to block the native TolC function as an antibiotic efflux pump.  
101 Because they are accessible from outside the cell, OMPs are attractive targets for the  
102 development of novel antibiotics, and research has begun to reveal the therapeutic potential of  
103 interfering with OMP structure and function. Recently, a monoclonal antibody was found to  
104 inhibit OMP folding with bactericidal effects<sup>27</sup>.

105 Here by determining the structure and mechanism of colE1 insertion we establish an  
106 alternative approach for targeting OMPs—the development of molecular plugs that block OMP  
107 pores. Such plugs would allow for the manipulation of bacterial transport, providing a means of  
108 either starving the bacterium by preventing the import of valuable nutrients or poisoning the  
109 bacterium by preventing the export of toxins. Through real-time efflux assays, minimum  
110 inhibitory concentration (MIC) experiments, we find that colE1-TR and colE1-T are able to  
111 inhibit TolC-mediated efflux. We find that this plugging of TolC reduces the amount of  
112 antibiotics required to inhibit the bacterial growth—indicating that this colicin E1 fragment  
113 reduces the antibiotic resistance conferred by TolC.

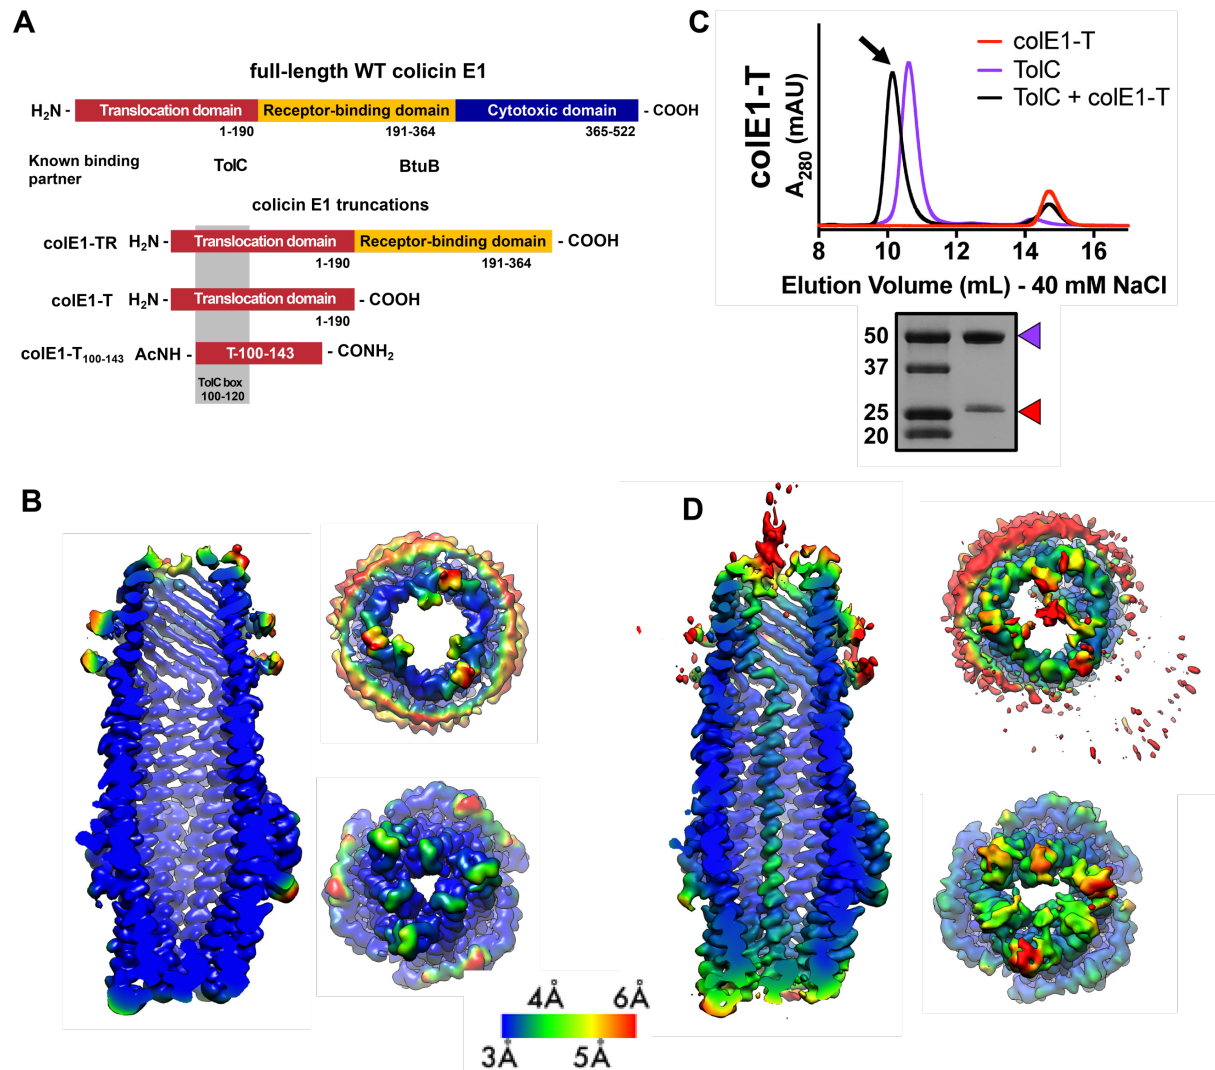

**Figure 1. Cell-surface localization of colicin E1 fragments.** (A) Architecture of full-length colicin E1 showing domains and their known binding partners. Three truncation constructs used in this study (B) CryoEM structure of TolC embedded in nanodiscs. Side, top, and bottom views are colored by local resolution, as computed in cryoSPARC from the final half-maps. The side view is cropped to display the particle interior. (C) SEC chromatogram of colE1-T (red line) and TolC (purple line). The arrow indicates the co-elution (black line) fractions that were analyzed by SDS-PAGE. On the SDS-PAGE gel (bottom), red arrows indicate the presence of the colicin E1 construct that has co-eluted with TolC. (D) The CryoEM structure of colE1-T bound to TolC and colored by local resolution as in (B).

## 115 **RESULTS**

### 116 **CryoEM structure of TolC embedded in nanodiscs**

117 To determine the structural details of colicin E1 binding to TolC, we solved the cryoEM  
118 (cryogenic electron microscopy) structure of TolC embedded in nanodiscs with and without  
119 added colE1-T (PDB 6WXH and 6WXI, respectively). We recently reported a high-yield TolC  
120 preparation by refolding from inclusion bodies<sup>28</sup> and inserted refolded TolC into nanodiscs. The  
121 cryoEM structure of refolded TolC alone (Figure 1B) is similar to the previously published  
122 crystal structures of natively derived TolC alone<sup>29</sup> or in complex with hexammincobalt<sup>30</sup> but  
123 with more splayed loops at the periplasmic opening (residues 165-175). There was local  
124 variation in resolution within the model with lower resolution associated with the  
125 extracellular/periplasmic ends and the nanodisc scaffold protein (Figure 1B). The lower residue  
126 resolution at these apertures may indicate dynamics not captured in the x-ray crystal structures.

127 We next determined binding of colicin E1-T domain to capture the complex for structure  
128 determination. Residues 1-190 (colE1-T) which span the translocation domain and are known to  
129 bind to TolC (Figure 1A). We determined colE1-T:TolC binding *in vitro* via co-elution by size  
130 exclusion chromatography (SEC) as previously described<sup>6</sup>. When colE1-T and TolC were  
131 mixed, we observed a leftward shift in the TolC peak and a decrease in intensity associated with  
132 the colE1-T peak indicating that a subset of the population has migrated with TolC (Figure 1C).  
133 We analyzed the peak (Figure 1C arrow) using SDS-PAGE and found the presence of both  
134 colE1-T and TolC. The unimodal shifted peak observed with colE1-T:TolC indicates that there is  
135 a single species of fully bound TolC. When resolved by cryoEM, addition of colE1-T to TolC  
136 breaks the three-fold channel symmetry and the additional protein is observed running all the  
137 way through the TolC barrel as a single-pass, all- $\alpha$ -helical chain spanning more than 130 Å



138 (Figure 1D). The maps refined to nominal global resolutions of 2.84 Å and 3.09 Å for the TolC  
139 and colE1-T:TolC, respectively (Table S1).

140 The colE1 T domain inserts into TolC with its amino terminus pointing inwards through  
141 the periplasmic iris, and 2D class-averages show that the carboxy terminus of the helix continues  
142 and projects out into the extracellular space (Figure 2A). 85 of the 190 colE1-T residues could be  
143 modeled to this density (residues 46-131) (Figure 2B). No such regular protrusion was seen for  
144 the glycine-rich colE1 amino-terminus, which we expect to be disordered in the periplasmic

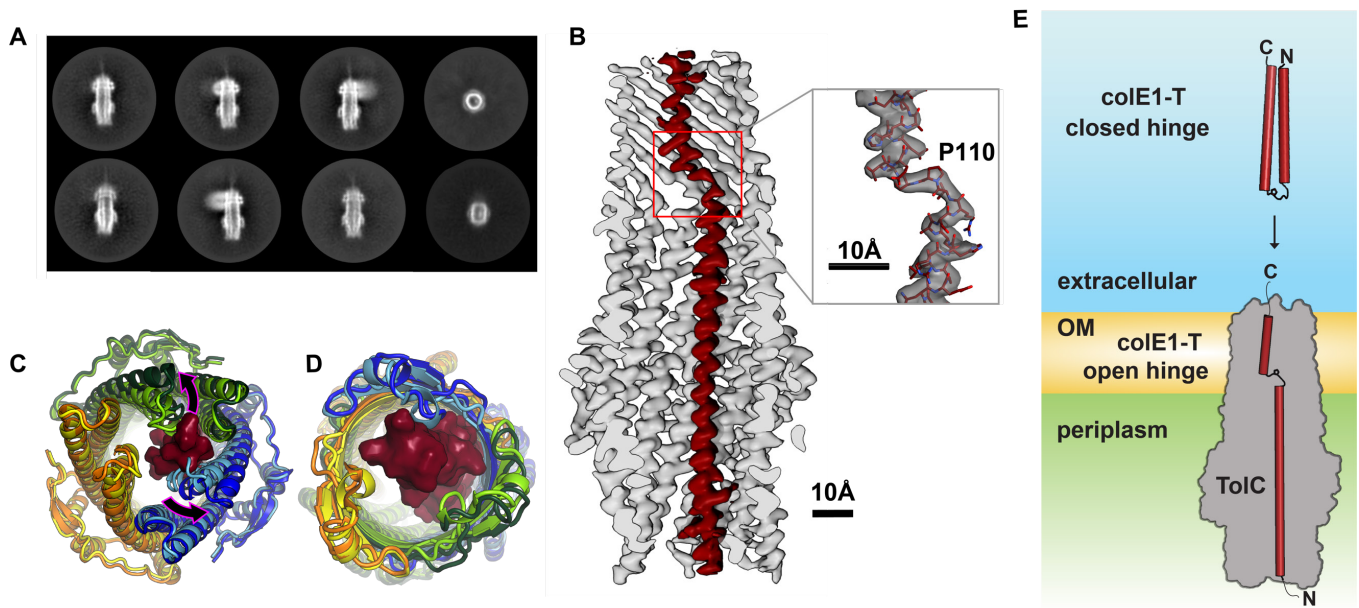

**Figure 2. Colicin E1 binds to TolC as a single-pass kinked helix.** (A) 2D class averages of colE1-T bound to TolC imbedded in nanodiscs (B) Cutaway view of the TolC interior (gray). ColE1-T (red) binds asymmetrically in an open-hinge conformation. The hinge region of colE1T including P110 shown in stick representation (inset). (C and D) The dilated terminal apertures. The apo cryoEM structure of TolC (subunits colored light blue, light green, and yellow) compared to holo cryoEM structure (subunits colored dark blue, dark green and orange). (C) Periplasmic aperture. (D) Extracellular aperture. (E) In the unbound state, colE1-T (red cylinders) exists as a closed hinge. When bound, colE1-T is in an open-hinge conformation through TolC with the N-terminus into the pore of TolC (grey). The homology model of colE1-T in its solution state was built using I-TASSER<sup>4</sup> and is consistent with previous experiments<sup>6</sup>.



145 space<sup>22,26,31</sup>. The colE1 chain binds TolC asymmetrically, primarily contacting only one of the  
146 three TolC chains.

147 Compared to the unbound state, asymmetric colE1 binding dilates the periplasmic TolC  
148 aperture (Figure 2C) and, to a lesser extent, the extracellular aperture (Figure 2D) so that they  
149 can accommodate colE1 in the absence of any other proteins or motive force. Although the  
150 terminal apertures dilate and are filled by the ligand and the TolC box forms specific interactions  
151 with the TolC inner wall, the large internal volume of TolC is not fully occupied by colE1.

152 In solution, unbound colicin E1 is a two-helix hairpin as indicated by far UV circular  
153 dichroism (CD)<sup>6</sup>. A homology model built using I-TASSER<sup>4</sup> also predicts the closed hinge  
154 conformation with proline 110 at the apex (Figure 2E top). However, our cryoEM reconstruction  
155 of colicin E1 in complex with TolC shows that colE1-T hinges open at the TolC box to an  
156 extended conformation upon binding to TolC (Figure 2B, and 2E bottom). The colE1-T helices  
157 have a short kink in the middle around proline 110, precisely at the proposed turn location in the  
158 hairpin model (Figure 2B inset). This area is also the center of the TolC box that has been known  
159 to be critical for the colE1:TolC interaction<sup>22,24</sup>.

160

### 161 **Colicin E1 makes residue-specific interactions with TolC**

162 TolC forms a large rigid conduit in the outer membrane and periplasm (Figure  
163 3A) with a water filled lumen. The hydrophilic nature of the channel<sup>32</sup> coupled with the  
164 inflexibility of the outer-membrane-embedded barrel largely precludes the formation of any  
165 hydrophobic interfaces that are typically the basis of protein-protein interfaces involving helical

166 peptides. Yet, we did observe specific polar contacts between colicin E1's TolC box and the  
167 TolC barrel.

168 To obtain the most accurate atomic model for interpretation of atomic interactions  
169 between peptides, we utilized map-restrained molecular dynamics in model refinement<sup>33</sup>. The  
170 refined model had improved chemical plausibility (for instance, MolProbity<sup>34</sup> score improved  
171 from 1.25 to 0.50) and polar contact were more easily identified. Because this refinement

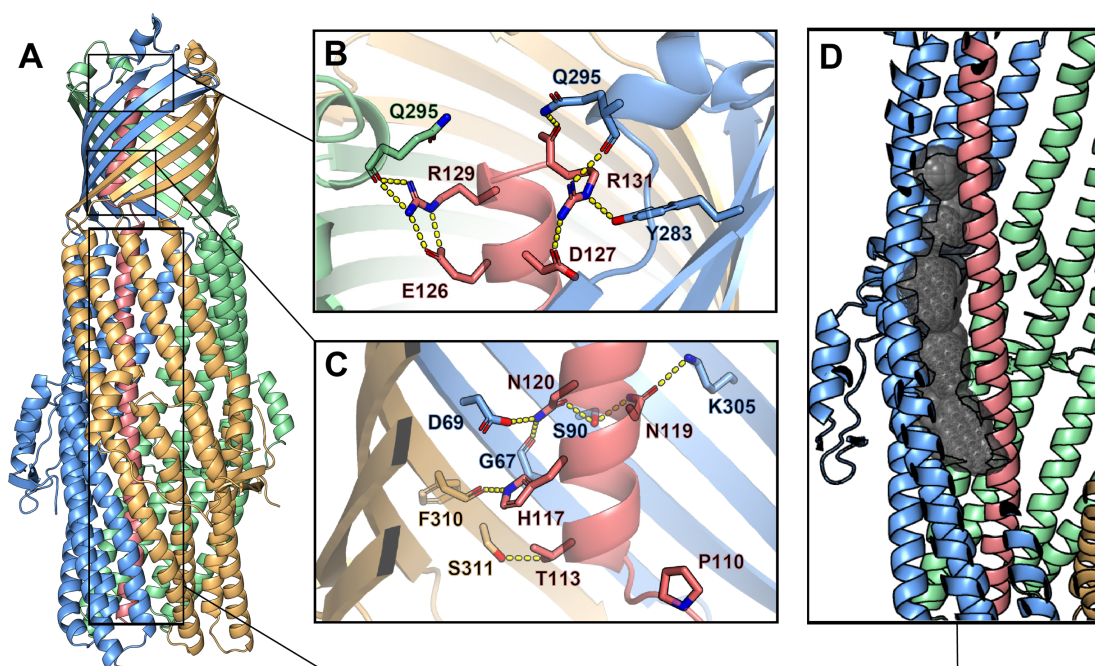

**Figure 3. Inter-chain contacts between colE1T and TolC.** (A) Molecular dynamics simulation refined structure of the colE1-T:TolC complex colored by chain (colE1-T: light red, TolC: light blue, light green, light gold) (B-C) Polar interaction network of colE1-T and TolC on the C-terminal side of the proline kink in the  $\beta$ -barrel region. (B) near the extracellular opening of TolC and (C) before the transition to the TolC periplasmic helical region. Residues involved in forming polar interactions and proline 110 are shown in sticks. (D) ColE1-T spanning the TolC helical barrel does not make full contact with the side of the TolC barrel. The cavity (black spheres) between colicin (light red) and one chain of TolC (light blue) was detected using GHECOM<sup>1-3</sup>

172 improved the concordance between the map and model, we conclude that the use of cryoEM  
173 density as a restraint was successful in preventing overfitting. Specifically, the EMRinger<sup>35</sup> score  
174 improved from 2.77 to 3.81 and the map-model FSC=0.5 improved from 3.44Å to 3.37Å.

175           The atomic model showed significant polar interactions form between colicin E1 and  
176 TolC at the apertures and around the TolC box. The acidic patch of colicin E1 near the  
177 extracellular aperture contains two arginine residues (R129 and R131) that form hydrogen bond  
178 networks with one TolC chain each (Figure 3B). In addition, colicin E1 residues T113, A116,  
179 N119, N120 (all part of the TolC box) establish polar interactions with TolC residues G67, D69,  
180 S90 and K305 on one TolC chain (Figure 3C, light red and light blue) while colicin H117  
181 interacts with TolC F310 on a neighboring TolC chain (Figure 3C, light red and light gold). By  
182 contrast with the  $\beta$ -barrel of TolC, in the interior of periplasmic helical barrel of TolC, colicin E1  
183 does not make full contact with the  $\alpha$ -helical barrel interior and there is a gap between the two  
184 proteins (Figure 3D). This is in agreement with previous studies that showed a colicin truncation  
185 (residues 1-100) that ends just before the beginning of the TolC box does not bind to TolC<sup>22</sup> or  
186 prevent cytotoxicity of full-length colicin in cells<sup>24</sup>.

187           Moreover, this structure is consistent with reports that mutations at TolC sites G43 or  
188 S257 abrogate colE1 activity<sup>36</sup> as these residues are contact sites between TolC and colE1  
189 (Figure S1). Conversely, the absence of any effect of mutating colicin R103 and R108<sup>24</sup>, is  
190 consistent with interaction those residues have with the barrel solvent rather than TolC. The  
191 newly solved structure, in combination with previous work<sup>22,24</sup>, indicates the specificity of  
192 colicin E1 binding to TolC is encoded in the portion that binds to TolC  $\beta$ -barrel.

### 193 **Membrane localization of colE1 truncations**

194           Since we find the colE1 T domain binds to TolC, we investigated if colicin E1 fragments  
195 bind to the native TolC in *E. coli* cells. Though ColE1 C domain activity—depolarizing the inner  
196 membrane—requires the C domain to pass through the outer membrane<sup>37</sup>, it remains unclear if  
197 the colE1-TR domains translocate as well. We first determined *in vitro* binding of colE1-TR,

198 which includes residues 1-364 (colE1-TR) (Figure 1A) which contains the N-terminal portion  
199 that binds to TolC and the C-terminal portion that binds to BtuB. ColE1-TR aggregates at the salt  
200 concentration (40 mM) used for the co-elution experiment used for colE1-T so we increased the  
201 NaCl concentration to 200 mM. ColE1-T still binds to TolC at 250 mM NaCl although to a much  
202 lesser degree (Figure S2). Unlike colE1-T (Figure 1C), colE1-TR shows a bimodal distribution  
203 indicative of a mixed population of bound and unbound TolC (Figure 4A). Using an extracellular  
204 protease digestion assay, we assessed whether colE1-T and colE1-TR translocate into the cell or  
205 localize on the cell surface. ColE1 fragments were incubated with cells, washed, and treated with  
206 or without trypsin to digest any extracellularly bound protein to cells. When probing for the C-  
207 terminal epitope by immunoblotting, there was no detectible colE1-T binding (Figure 4B, left),  
208 though there was detectible binding of ColE1-TR (Figure 4B, right). Moreover, we found that if  
209 colE1-TR is incubated with cells and subsequently treated with increasing trypsin concentrations,  
210 the colE1-TR band disappeared, indicating that the colicin E1 fragment was localized to the  
211 outer membrane surface (Figure 4B, right). The colE1-TR band of the intact cells may be slightly  
212 less intense than the colE1 band for lysed cells due to some aggregation and precipitation of the  
213 intact cell and proteins bound to it when boiling the whole cells for loading the SDS-PAGE. The  
214 periplasmic control SurA was not degraded at any trypsin concentration unless the cells were  
215 lysed before trypsin digestion<sup>38</sup>.

216 Since the proteolysis experiments are not sensitive enough to detect if only a few  
 217 molecules have entered the cell, we further probed the interaction between the cell membrane  
 218 and surface-localized colE1-TR with single-molecule fluorescence microscopy using the  
 219 fluorescent dye Cy3. This method is able to detect single molecules on the cell surface as well as  
 220 those within the cell indicative of those molecules having crossed the outer membrane<sup>39,40</sup>. When  
 221 colE1-TR-Cy3 was added to the extracellular environment of WT BW25113 *E. coli* (containing  
 222 TolC), distinct puncta (Figure 4C, left) formed on 94% of the cells ( $n = 111$ ) (Figure 4D). In a  
 223  $\Delta tolC$  strain, puncta were observed on only 18% of cells ( $n = 99$ ) (Figure 4C, right; Figure 4D).  
 224 As a  $\Delta btuB$  control strain, we used BL21 (DE3) which is known to have a premature stop codon  
 225 at *btuB* residue 58<sup>41</sup>. Puncta were observed on only 3% of cells lacking BtuB ( $n = 105$ ) (Figure  
 226 4D and S3A). In WT and  $\Delta tolC$  cells that featured puncta, colE1-TR formed puncta consistent

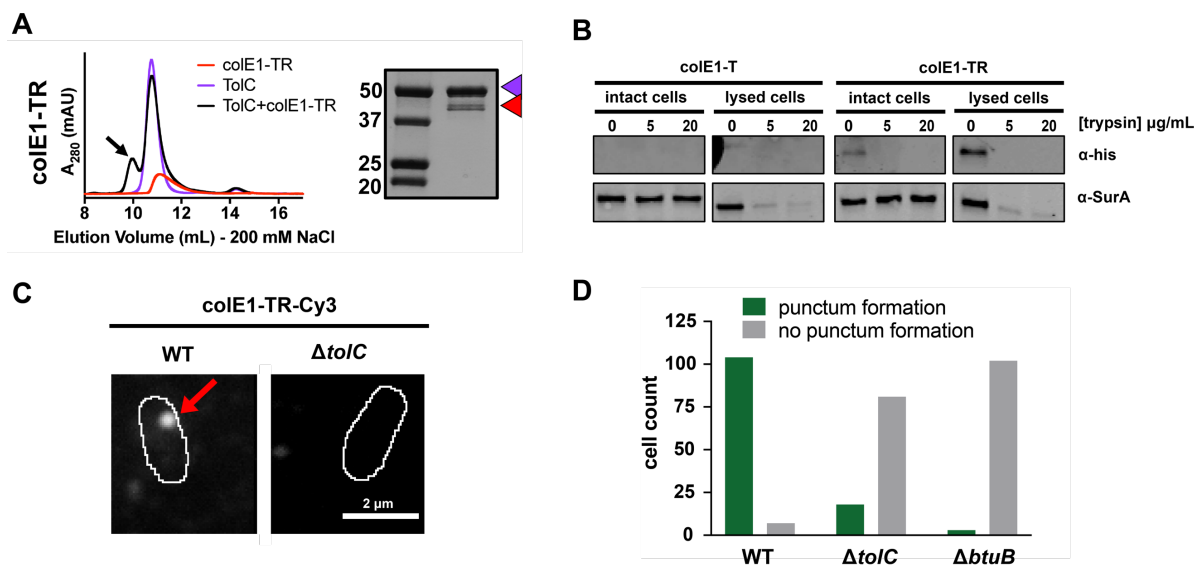

**Figure 4. Colicin E1-TR localizes on the outside of the cell.** (A) SEC chromatogram of colE1-TR (red line) and TolC (purple line). The arrow indicates the co-elution (black line) fractions that were analyzed by SDS-PAGE. On the SDS-PAGE gels (right), red arrow indicates the presence of colicin E1 construct that has co-eluted with TolC (purple arrow). (B) Extracellular protease digestion assay with two colicin E1 truncation constructs, each labeled with a C-terminal His-Tag. Periplasmic SurA was used as a membrane integrity control. (C) Fluorescence image of colE1-TR-Cy3 overlaid on outlines of living *E. coli* cells for WT and  $\Delta tolC$ . Red arrow points to a punctum. (D) Cell counts where colE1-TR-Cy3 punctum formation was observed for WT,  $\Delta tolC$ , and  $\Delta btuB$ .

227 with ~20 molecules. The observed size and number of molecules are in agreement with previous  
228 studies of BtuB puncta<sup>42,43</sup>. To rule out punctum formation as an artifact of Cy3 conjugation, we  
229 found colE1-TR-GFP displayed the same cluster formation as colE1-TR-Cy3 (Figure S3B). No  
230 other single protein binding events were detected aside from the puncta on either WT or  $\Delta tolC$   
231 cells.

232 Fluorescently labeled pyocins, the colicin analog in *Pseudomonas*, have previously been  
233 used to detect translocation across the outer membrane of *Pseudomonas aeruginosa*<sup>44</sup>. Here we  
234 use an analogous experiment with fluorescently labeled colE1 to determine cellular localization  
235 in *E. coli*. In time courses, bound colE1-TR puncta remained immobile for > 5 minutes (Movie  
236 S1). This is consistent with continued association of colE1-TR with membrane-embedded BtuB,  
237 which has limited mobility<sup>45</sup>. This result indicates that colE1-TR does not fully translocate<sup>44</sup>,  
238 because if colE1-TR entered the periplasmic space it would freely diffuse on these timescales.

239 Colicin constructs lacking the R domain (colE1-T-Cy3) showed no detectable binding  
240 either to WT or  $\Delta tolC$  cells (Figure S3C), indicating that the TolC-colE1-T interaction is much  
241 weaker than the BtuB-colE1-TR interaction.

242 Because we only see one punctum per cell, we anticipate that some BtuB and TolC  
243 remain unbound because of the geometric constraints of punctum formation. Though BtuB and  
244 TolC need to be in close proximity for colE1 binding to occur, when BtuB clusters together in  
245 groups of 12 or more, it may exclude TolC. These cluster geometries would therefore lower the  
246 number of full binding sites available for the T and R domains of colicin E1.

247

248 **ColE1-TR inhibits efflux and makes *E. coli* more susceptible to antibiotics**

249 Since the colicin truncations are stalled on their respective OMP receptors, we

250 investigated if this stalling could disrupt native TolC efflux. Real-time efflux inhibition by

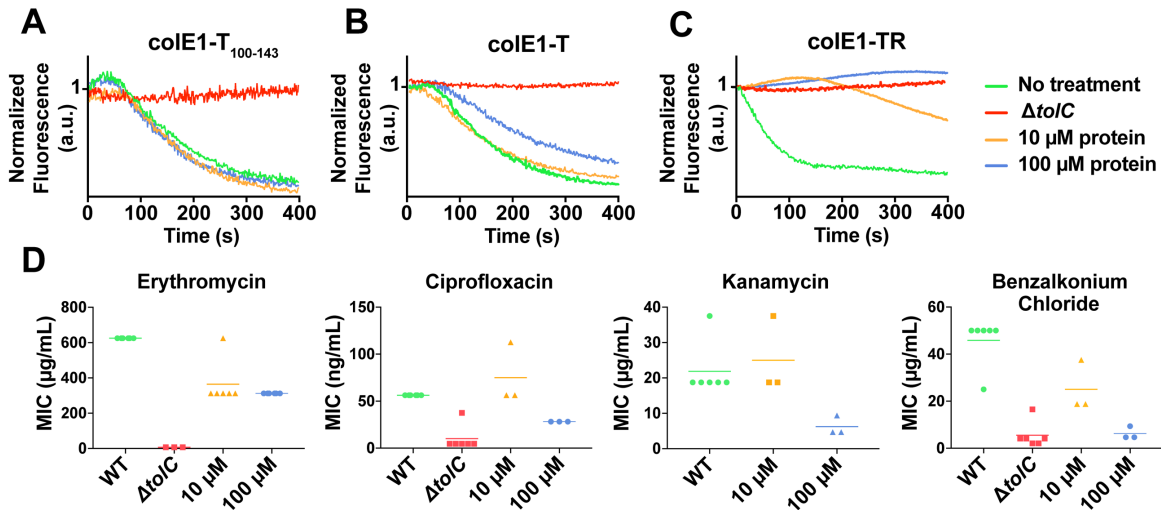

**Figure 5. Colicin E1 fragments inhibit efflux and potentiate antibiotics.**

(A-C) Effect of colicin E1 fragments on efflux: WT with no protein (green),  $\Delta tolC$  (red), WT + 10  $\mu M$  (orange), WT + 100  $\mu M$  protein (blue). (A) colE1-T<sub>100-143</sub>, (B) colE1-T, (C) colE1-TR. (D) Antibiotic susceptibilities in the absence (green) and presence of colE1-TR added to WT at 10  $\mu M$  (orange) and 100  $\mu M$  (blue). MICs for  $\Delta tolC$  (red) are included as a reference. Data are biological replicates reported as the mean and individual data points.

251 colicin E1 fragments was assessed using a live-cell assay with N-(2-naphthyl)-1-naphthylamine  
252 (NNN)-dye, which is effluxed by the acridine efflux pump and fluoresces when it is localized  
253 inside the cell<sup>46</sup>. NNN efflux can be turned off by the protonophore CCCP, which neutralizes the  
254 proton motive force and allows NNN to accumulate within the cell. Active efflux can then be  
255 monitored by the fluorescence decay once proton motive force is reenergized by glucose  
256 addition<sup>46-50</sup>.

257 We assessed the ability of colicin E1 truncations to plug TolC by monitoring real-time  
258 NNN efflux. Cells exposed to colE1-T<sub>100-143</sub> did not show lower real-time efflux than untreated



259 cells (Figure 5A). This observation is notable in light of the fact that, in previous conductance  
260 studies, similar peptides were shown to bind TolC<sup>6,24</sup> and to occlude the channel<sup>6,23</sup>.

261 Cells exposed to colE1-T showed less decay in final fluorescence than untreated cells,  
262 indicating that colE1-T partially inhibits efflux (Figure 5B). Finally, exposure to colE1-TR  
263 produced no decrease in fluorescence, showing full inhibition of efflux (Figure 5C).

264 Because colE1-TR completely inhibits NNN efflux, we evaluated the capacity of colE1-  
265 TR to potentiate antibiotics representing four different classes that are known TolC substrates:  
266 kanamycin, ciprofloxacin, erythromycin, and benzalkonium chloride (from aminoglycosides,  
267 fluoroquinolones, macrolides, and quaternary ammonium compounds, respectively). An effective  
268 TolC plug will reduce the concentration required to inhibit growth as antibiotics remain trapped  
269 within the cell. WT *E. coli* cells that were exposed to 100  $\mu$ M colE1-TR with each of these  
270 antibiotics showed significantly lower minimum inhibitory concentrations (MICs), the lowest  
271 concentration of antibiotic that inhibits visible growth, than cells exposed to the antibiotics alone  
272 (Fig. 5D): exposure to 100  $\mu$ M colE1-TR made WT *E. coli* ~2 to 7-fold more susceptible to these  
273 antibiotics (Table S2). Engagement of TolA by the N-terminal TolA box of colicin E9 has  
274 previously been shown to cause outer membrane defects<sup>51</sup> which would lead to enhanced  
275 antibiotic susceptibility. To rule out outer membrane-mediated defects caused by the TolA box in  
276 colE1, we created a truncation of colE1-TR (colE1-TR $_{\Delta 1-40}$ ) lacking the N-terminal 40 residues  
277 including the TolA box. The MIC of colE1-TR and colE1-TR $_{\Delta 1-40}$  are identical (Figure S4)  
278 indicating that colE1-TR engagement of TolA does not contribute to the observed antibiotic  
279 susceptibility.

## 280 Discussion

281 There are two conflicting models of colE1 translocation: 1) the total thread model in  
282 which the entire colicin unfolds and threads through TolC<sup>24,52</sup> and 2) the pillar model, in which  
283 colicin E1 inserts into TolC as a helical hairpin, facilitating LPS-mediated self-translocation of  
284 the colicin cytotoxic domain<sup>6</sup>. Our data support aspects of both models. The belief in a closed  
285 hinge conformation of bound colE1 prompted two arguments against the total thread mechanism:  
286 1) the colE1-T closed hinge conformation is too wide to fit through TolC and 2) both ends would  
287 face the extracellular milieu<sup>6,52</sup>. The unanticipated colE1-T hinge opening in the bound state  
288 resolves these objections: colicin threads into the TolC barrel with the amino terminus pointing  
289 into the periplasm, as the total thread model hypothesized. However, our trypsin digests and  
290 single-molecule fluorescence images show colE1-TR stalls at the outer membrane. Though we  
291 cannot exclude the possibility that full length protein translocation depends on the C domain, we  
292 observe—as hypothesized by the pillar model—that colicin sits inside TolC but does not  
293 translocate. However, the architecture of the complex differs from that hypothesized by the pillar  
294 model. These results are in agreement with early studies of pore-forming colicins in which  
295 trypsin added to the extracellular environment can reverse colicin activity. Digestibility by  
296 trypsin, as well as the ability of colE1-T/TolC to reconstitute a monodisperse stable complex *in*  
297 *vitro* are consistent with the colicin remain in contact with its outer membrane receptors while  
298 the cytotoxic domain depolarizes the inner membrane.

299 In addition to demonstrating a colicin insertion mechanism, our observations form the  
300 basis of a means to manipulate bacterial import and efflux. Though colicin E1 confers some level  
301 of antibiotic potentiation, the relatively high concentration of colE1-TR needed to inhibit efflux  
302 may be explained by a combination of the geometric constraints of creating large clusters of

303 BtuB and TolC, low colE1-T-TolC affinity<sup>53</sup>, and residually unblocked pore, even in the bound  
304 state. Because of their limited potency, our colE1-T and colE1-TR fragments are not likely to be  
305 practical in direct applications of antibiotic potentiation. However, our proof-of-concept findings  
306 offer a potential roadmap for further development. A more potent TolC binder would not need  
307 the R domain anchor for affinity. Such a binder could be designed using the atomic details of the  
308 colE1-T-TolC structure as a basis. Moreover, this scaffold can be used for efflux pump inhibitors  
309 for at least five other bacterial organisms. Each of these organisms has a structurally  
310 characterized outer membrane efflux pump that is homologous and structurally similar to TolC<sup>54</sup>.

311 More broadly, there are at least nine known outer membrane protein receptors for  
312 bacteriocins. These outer membrane proteins have a variety of functions including adhesion, iron  
313 transport, and general import<sup>12,55</sup>. Using this same strategy with fragments derived from other  
314 bacteriocins may additionally allow for controlled inhibition of other bacterial functions.

315 **Acknowledgments** We gratefully acknowledge Daniel Montezano, Pinakin Sukthankar, Rik  
316 Dhar, Dwight Deay, Scott Lovell, Matthias Wolf, Alexander Little, Heather Shinogle, and Sarah  
317 Noga for discussions and feedback, Mark Richter for the use of his fluorometer, Rajeev Misra  
318 for the pTrc vector containing the TolC gene, Vasileios Petrou for guidance on nanodiscs,  
319 Chamani Perera for peptide synthesis, Karen Marom for editorial guidance. We thank the Office  
320 of Advanced Research computing (OARC) at Rutgers for high-performance computing  
321 resources. Funding: NIH award R21-GM128022 to JSB, NIGMS awards DP2GM128201,  
322 P20GM113117, P20GM103638 and the Gordon and Betty Moore Inventor Fellowship to JSGS,  
323 and NIGMS awards P20 GM103418 and 2K12GM063651 to SJB.

324 **Author contributions** Conceptualization: SJB, JSGS; Methodology: SJB, JTK, JSGS, JSB;  
325 Writing: SJB, JSGS, JSB, JTK; Editing: SJB, JSGS, JSB, JTK; Investigation: SJB, JJS, ALC,  
326 API, VKW, EF, DAC, and JTK.

327 **Competing interests** The authors declare no competing interests.

328  
329

330

## References

- 331 1. Kawabata, T. Detection of multiscale pockets on protein surfaces using mathematical  
332 morphology. *Proteins* **78**, 1195-211 (2010).
- 333 2. Kawabata, T. Detection of cave pockets in large molecules: Spaces into which internal  
334 probes can enter, but external probes from outside cannot. *Biophys Physicobiol* **16**, 391-  
335 406 (2019).
- 336 3. Kawabata, T. & Go, N. Detection of pockets on protein surfaces using small and large  
337 probe spheres to find putative ligand binding sites. *Proteins* **68**, 516-29 (2007).
- 338 4. Yang, J. et al. The I-TASSER Suite: protein structure and function prediction. *Nat*  
339 *Methods* **12**, 7-8 (2015).
- 340 5. Alexander, C. & Rietschel, E.T. Invited review: Bacterial lipopolysaccharides and innate  
341 immunity. *Journal of Endotoxin Research* **7**, 167-202 (2001).
- 342 6. Zakharov, S.D., Wang, X.S. & Cramer, W.A. The Colicin E1 TolC-Binding Conformer:  
343 Pillar or Pore Function of TolC in Colicin Import? *Biochemistry* **55**, 5084-5094 (2016).
- 344 7. Kamio, Y. & Nikaido, H. Outer membrane of *Salmonella typhimurium*: accessibility of  
345 phospholipid head groups to phospholipase c and cyanogen bromide activated dextran in  
346 the external medium. *Biochemistry* **15**, 2561-70 (1976).
- 347 8. Freeman, J.T.C. & Wimley, W.C. TMBB-DB: a transmembrane  $\beta$ -barrel proteome  
348 database. *Bioinformatics* **28**, 2425-2430 (2012).
- 349 9. Cramer, W.A., Sharma, O. & Zakharov, S.D. On mechanisms of colicin import: the outer  
350 membrane quandary. *Biochem J* **475**, 3903-3915 (2018).
- 351 10. Buchanan, S.K. et al. Structure of colicin I receptor bound to the R-domain of colicin Ia:  
352 implications for protein import. *EMBO J* **26**, 2594-604 (2007).
- 353 11. Kurisu, G. et al. The structure of BtuB with bound colicin E3 R-domain implies a  
354 translocon. *Nat Struct Biol* **10**, 948-54 (2003).
- 355 12. Cascales, E. et al. Colicin Biology. *Microbiology and Molecular Biology Reviews* **71**,  
356 158-229 (2007).
- 357 13. Housden, N.G. et al. Directed epitope delivery across the *Escherichia coli* outer  
358 membrane through the porin OmpF. *Proc Natl Acad Sci U S A* **107**, 21412-7 (2010).
- 359 14. Sharma, O. et al. Structure of the complex of the colicin E2 R-domain and its BtuB  
360 receptor. The outer membrane colicin translocon. *J Biol Chem* **282**, 23163-70 (2007).
- 361 15. Benedetti, H. et al. Individual domains of colicins confer specificity in colicin uptake, in  
362 pore-properties and in immunity requirement. *J Mol Biol* **217**, 429-39 (1991).
- 363 16. Benedetti, H. et al. Comparison of the Uptake Systems for the Entry of Various BtuB  
364 Group Colicins into *Escherichia coli*. *Microbiology* **135**, 3413-3420 (1989).
- 365 17. Elkins, P., Bunker, A., Cramer, W.A. & Stauffacher, C.V. A mechanism for toxin  
366 insertion into membranes is suggested by the crystal structure of the channel-forming  
367 domain of colicin E1. *Structure* **5**, 443-58 (1997).
- 368 18. Plate, C.A. & Luria, S.E. Stages in colicin K action, as revealed by the action of trypsin.  
369 *Proc Natl Acad Sci U S A* **69**, 2030-4 (1972).
- 370 19. Dankert, J., Hammond, S.M. & Cramer, W.A. Reversal by trypsin of the inhibition of  
371 active transport by colicin E1. *J Bacteriol* **143**, 594-602 (1980).
- 372 20. Dankert, J.R., Uratani, Y., Grabau, C., Cramer, W.A. & Hermodson, M. On a domain  
373 structure of colicin E1. A COOH-terminal peptide fragment active in membrane  
374 depolarization. *J Biol Chem* **257**, 3857-63 (1982).

- 375 21. Benedetti, H., Lloubes, R., Lazdunski, C. & Letellier, L. Colicin A unfolds during its  
376 translocation in Escherichia coli cells and spans the whole cell envelope when its pore  
377 has formed. *EMBO J* **11**, 441-7 (1992).
- 378 22. Zakharov, S.D., Wang, X.S. & Cramer, W.A. The Colicin E1 TolC-Binding Conformer:  
379 Pillar or Pore Function of TolC in Colicin Import? *Biochemistry* **55**, 5084-94 (2016).
- 380 23. Zakharov, S.D. et al. Colicin occlusion of OmpF and TolC channels: outer membrane  
381 translocons for colicin import. *Biophys J* **87**, 3901-11 (2004).
- 382 24. Jakes, K.S. The Colicin E1 TolC Box: Identification of a Domain Required for Colicin  
383 E1 Cytotoxicity and TolC Binding. *J Bacteriol* **199**(2017).
- 384 25. Wiener, M., Freymann, D., Ghosh, P. & Stroud, R.M. Crystal structure of colicin Ia.  
385 *Nature* **385**, 461-4 (1997).
- 386 26. Housden, N.G. et al. Intrinsically disordered protein threads through the bacterial outer-  
387 membrane porin OmpF. *Science* **340**, 1570-4 (2013).
- 388 27. Storek, K.M. et al. Monoclonal antibody targeting the beta-barrel assembly machine of  
389 Escherichia coli is bactericidal. *Proc Natl Acad Sci U S A* **115**, 3692-3697 (2018).
- 390 28. Budiardjo, S.J. et al. High-Yield Preparation of Outer Membrane Protein Efflux Pumps  
391 by in Vitro Refolding is Concentration Dependent. *J Membr Biol* **254**, 41-50 (2021).
- 392 29. Koronakis, V., Sharff, A., Koronakis, E., Luisi, B. & Hughes, C. Crystal structure of the  
393 bacterial membrane protein TolC central to multidrug efflux and protein export. *Nature*  
394 **405**, 914-9 (2000).
- 395 30. Higgins, M.K. et al. Structure of the ligand-blocked periplasmic entrance of the bacterial  
396 multidrug efflux protein TolC. *J Mol Biol* **342**, 697-702 (2004).
- 397 31. Housden, N.G. et al. Directional Porin Binding of Intrinsically Disordered Protein  
398 Sequences Promotes Colicin Epitope Display in the Bacterial Periplasm. *Biochemistry*  
399 **57**, 4374-4381 (2018).
- 400 32. Dhar, R., Feehan, R. & Slusky, J.S.G. Membrane Barrels Are Taller, Fatter, Inside-Out  
401 Soluble Barrels. *J Phys Chem B* **125**, 3622-3628 (2021).
- 402 33. Wu, X., Subramaniam, S., Case, D.A., Wu, K.W. & Brooks, B.R. Targeted  
403 conformational search with map-restrained self-guided Langevin dynamics: application  
404 to flexible fitting into electron microscopic density maps. *J Struct Biol* **183**, 429-440  
405 (2013).
- 406 34. Williams, C.J. et al. MolProbity: More and better reference data for improved all-atom  
407 structure validation. *Protein Sci* **27**, 293-315 (2018).
- 408 35. Barad, B.A. et al. EMRinger: side chain-directed model and map validation for 3D cryo-  
409 electron microscopy. *Nat Methods* **12**, 943-6 (2015).
- 410 36. Masi, M., Vuong, P., Humbard, M., Malone, K. & Misra, R. Initial steps of colicin E1  
411 import across the outer membrane of Escherichia coli. *J Bacteriol* **189**, 2667-76 (2007).
- 412 37. Brunden, K.R., Uratani, Y. & Cramer, W.A. Dependence of the conformation of a colicin  
413 E1 channel-forming peptide on acidic pH and solvent polarity. *J Biol Chem* **259**, 7682-7  
414 (1984).
- 415 38. Besingi, R.N. & Clark, P.L. Extracellular protease digestion to evaluate membrane  
416 protein cell surface localization. *Nat Protoc* **10**, 2074-80 (2015).
- 417 39. Tuson, H.H. & Biteen, J.S. Unveiling the inner workings of live bacteria using super-  
418 resolution microscopy. *Anal Chem* **87**, 42-63 (2015).

- 419 40. Al-Husini, N. et al. BR-Bodies Provide Selectively Permeable Condensates that  
420 Stimulate mRNA Decay and Prevent Release of Decay Intermediates. *Mol Cell* **78**, 670-  
421 682 e8 (2020).
- 422 41. Studier, F.W., Daegelen, P., Lenski, R.E., Maslov, S. & Kim, J.F. Understanding the  
423 differences between genome sequences of Escherichia coli B strains REL606 and  
424 BL21(DE3) and comparison of the E. coli B and K-12 genomes. *J Mol Biol* **394**, 653-80  
425 (2009).
- 426 42. Rassam, P. et al. Supramolecular assemblies underpin turnover of outer membrane  
427 proteins in bacteria. *Nature* **523**, 333-6 (2015).
- 428 43. Chavent, M. et al. How nanoscale protein interactions determine the mesoscale dynamic  
429 organisation of bacterial outer membrane proteins. *Nat Commun* **9**, 2846 (2018).
- 430 44. White, P. et al. Exploitation of an iron transporter for bacterial protein antibiotic import.  
431 *Proc Natl Acad Sci U S A* **114**, 12051-12056 (2017).
- 432 45. Kleanthous, C., Rassam, P. & Baumann, C.G. Protein-protein interactions and the  
433 spatiotemporal dynamics of bacterial outer membrane proteins. *Curr Opin Struct Biol* **35**,  
434 109-15 (2015).
- 435 46. Bohnert, J.A., Schuster, S., Szymaniak-Vits, M. & Kern, W.V. Determination of real-  
436 time efflux phenotypes in Escherichia coli AcrB binding pocket phenylalanine mutants  
437 using a 1,2'-dinaphthylamine efflux assay. *PLoS One* **6**, e21196 (2011).
- 438 47. Bohnert, J.A., Karamian, B. & Nikaido, H. Optimized Nile Red efflux assay of AcrAB-  
439 TolC multidrug efflux system shows competition between substrates. *Antimicrob Agents*  
440 *Chemother* **54**, 3770-5 (2010).
- 441 48. Seeger, M.A. et al. Engineered disulfide bonds support the functional rotation mechanism  
442 of multidrug efflux pump AcrB. *Nat Struct Mol Biol* **15**, 199-205 (2008).
- 443 49. Iyer, R., Ferrari, A., Rijnbrand, R. & Erwin, A.L. A fluorescent microplate assay  
444 quantifies bacterial efflux and demonstrates two distinct compound binding sites in AcrB.  
445 *Antimicrob Agents Chemother* **59**, 2388-97 (2015).
- 446 50. Misra, R., Morrison, K.D., Cho, H.J. & Khuu, T. Importance of Real-Time Assays To  
447 Distinguish Multidrug Efflux Pump-Inhibiting and Outer Membrane-Destabilizing  
448 Activities in Escherichia coli. *J Bacteriol* **197**, 2479-88 (2015).
- 449 51. Rassam, P. et al. Intermembrane crosstalk drives inner-membrane protein organization in  
450 Escherichia coli. *Nat Commun* **9**, 1082 (2018).
- 451 52. Cramer, W.A., Sharma, O. & Zakharov, S.D. On mechanisms of colicin import: the outer  
452 membrane quandary. *Biochemical Journal* **475**, 3903-3915 (2018).
- 453 53. Taylor, R., Burgner, J.W., Clifton, J. & Cramer, W.A. Purification and characterization of  
454 monomeric Escherichia coli vitamin B12 receptor with high affinity for colicin E3. *J Biol*  
455 *Chem* **273**, 31113-8 (1998).
- 456 54. Franklin, M.W. et al. Efflux Pumps Represent Possible Evolutionary Convergence onto  
457 the beta-Barrel Fold. *Structure* **26**, 1266-1274.e2 (2018).
- 458 55. Kleanthous, C. Swimming against the tide: progress and challenges in our understanding  
459 of colicin translocation. *Nat Rev Microbiol* **8**, 843-8 (2010).
- 460 56. Hagn, F., Nasr, M.L. & Wagner, G. Assembly of phospholipid nanodiscs of controlled  
461 size for structural studies of membrane proteins by NMR. *Nat Protoc* **13**, 79-98 (2018).
- 462 57. Wiegand, I., Hilpert, K. & Hancock, R.E. Agar and broth dilution methods to determine  
463 the minimal inhibitory concentration (MIC) of antimicrobial substances. *Nat Protoc* **3**,  
464 163-75 (2008).



- 465 58. Daury, L. et al. Tripartite assembly of RND multidrug efflux pumps. *Nat Commun* **7**,  
466 10731 (2016).  
467 59. Weis, F. & Hagen, W.J.H. Combining high throughput and high quality for cryo-electron  
468 microscopy data collection. *Acta Crystallogr D Struct Biol* **76**, 724-728 (2020).  
469 60. Mastronarde, D.N. Advanced Data Acquisition From Electron Microscopes With  
470 SerialEM. *Microscopy and Microanalysis* **24**, 864-865 (2018).  
471 61. Rice, W.J. et al. Routine determination of ice thickness for cryo-EM grids. *J Struct Biol*  
472 **204**, 38-44 (2018).  
473 62. Budiardjo, S.J. et al. High yield preparation of outer-membrane protein efflux pumps by  
474 &lt;em>in vitro</em> refolding is concentration dependent. *bioRxiv*,  
475 2020.09.14.296756 (2020).  
476 63. Punjani, A., Rubinstein, J.L., Fleet, D.J. & Brubaker, M.A. cryoSPARC: algorithms for  
477 rapid unsupervised cryo-EM structure determination. *Nat Methods* **14**, 290-296 (2017).  
478 64. Zivanov, J. et al. New tools for automated high-resolution cryo-EM structure  
479 determination in RELION-3. *Elife* **7**(2018).  
480 65. Rohou, A. & Grigorieff, N. CTFFIND4: Fast and accurate defocus estimation from  
481 electron micrographs. *J Struct Biol* **192**, 216-21 (2015).  
482 66. Wagner, T. et al. SPHIRE-crYOLO is a fast and accurate fully automated particle picker  
483 for cryo-EM. *Commun Biol* **2**, 218 (2019).  
484 67. Cardone, G., Heymann, J.B. & Steven, A.C. One number does not fit all: mapping local  
485 variations in resolution in cryo-EM reconstructions. *J Struct Biol* **184**, 226-36 (2013).  
486 68. Afonine, P.V. et al. Real-space refinement in PHENIX for cryo-EM and crystallography.  
487 *Acta Crystallogr D Struct Biol* **74**, 531-544 (2018).  
488 69. Croll, T.I. ISOLDE: a physically realistic environment for model building into low-  
489 resolution electron-density maps. *Acta Crystallogr D Struct Biol* **74**, 519-530 (2018).  
490 70. Emsley, P., Lohkamp, B., Scott, W.G. & Cowtan, K. Features and development of Coot.  
491 *Acta Crystallogr D Biol Crystallogr* **66**, 486-501 (2010).  
492 71. Maier, J.A. et al. ff14SB: Improving the Accuracy of Protein Side Chain and Backbone  
493 Parameters from ff99SB. *J Chem Theory Comput* **11**, 3696-713 (2015).  
494 72. Nguyen, H., Roe, D.R. & Simmerling, C. Improved Generalized Born Solvent Model  
495 Parameters for Protein Simulations. *J Chem Theory Comput* **9**, 2020-2034 (2013).  
496 73. Goddard, T.D. et al. UCSF ChimeraX: Meeting modern challenges in visualization and  
497 analysis. *Protein Sci* **27**, 14-25 (2018).  
498

499 **RESOURCE AVAILABILITY**

500 **KEY RESOURCES TABLE**

| REAGENT or RESOURCE                       | SOURCE    | IDENTIFIER                                  |
|-------------------------------------------|-----------|---------------------------------------------|
| Antibodies                                |           |                                             |
| THE HisTag mAb Mouse                      | GenScript | Cat#A00186-100;<br>RRID:19J001957           |
| anti-SurA Rabbit polyclonal               | Cusabio   | Cat#CSB-<br>PA359693HA01ENV;<br>RRID:E0109A |
| IRDye 800CW goat anti-mouse IgG secondary | LI-COR    | Cat#925-32210;<br>RRID:C81106-01            |



|                                                      |                                 |                                                                                                                                                   |
|------------------------------------------------------|---------------------------------|---------------------------------------------------------------------------------------------------------------------------------------------------|
| IRDye 800CW Donkey anti-Rabbit                       | LI-COR                          | Cat#925-32213;<br>RRID:C80829-10                                                                                                                  |
| <b>Bacterial and Virus Strains</b>                   |                                 |                                                                                                                                                   |
| BW25113                                              | Coli Genetic Stock Center       | Cat#7636                                                                                                                                          |
| JW5503-1                                             | Coli Genetic Stock Center       | Cat#11430                                                                                                                                         |
| BL21(DE3)                                            | Coli Genetic Stock Center       | Cat#12504                                                                                                                                         |
| <b>Chemicals, Peptides, and Recombinant Proteins</b> |                                 |                                                                                                                                                   |
| ToIC                                                 | This paper                      | N/A                                                                                                                                               |
| ColE1-T                                              | This paper                      | N/A                                                                                                                                               |
| ColE1-TR                                             | This paper                      | N/A                                                                                                                                               |
| ColE1-T100-143                                       | This paper                      | N/A                                                                                                                                               |
| <b>Deposited Data</b>                                |                                 |                                                                                                                                                   |
| ToIC alone map                                       | This paper                      | EMDB-21960<br>PDB 6WXI                                                                                                                            |
| ToIC-colE1-T complex map                             | This paper                      | EMDB-21959<br>PDB 6WXH                                                                                                                            |
| <b>Recombinant DNA</b>                               |                                 |                                                                                                                                                   |
| pTrc99a-NoSS-ToIC                                    | This paper                      | Addgene                                                                                                                                           |
| pET303-colE1-T                                       | This paper                      | Addgene                                                                                                                                           |
| pET303-colE1-TR                                      | This paper                      | Addgene                                                                                                                                           |
| MSP1D1                                               | Addgene                         | Cat#20061                                                                                                                                         |
| <b>Software and Algorithms</b>                       |                                 |                                                                                                                                                   |
| cryoSPARC 2 v2.12                                    | Punjani, Rubinstein et al. 2017 | <a href="https://cryosparc.com/">https://cryosparc.com/</a>                                                                                       |
| phenix v1.14-3260                                    | Afonine, Poon et al. 2018       | <a href="https://www.phenix-online.org/">https://www.phenix-online.org/</a>                                                                       |
| serialEM v3.7                                        | Mastrorade 2018                 | <a href="https://bio3d.colorado.edu/SerialEM/">https://bio3d.colorado.edu/SerialEM/</a>                                                           |
| coot v0.8.9.2-re 7766                                | Emsley, Lohkamp et al. 2010     | <a href="https://www2.mrc-lmb.cam.ac.uk/personal/pemsley/coot/">https://www2.mrc-lmb.cam.ac.uk/personal/pemsley/coot/</a>                         |
| ISOLDE v1.0b4.dev1                                   | Croll 2018                      | <a href="https://isolde.cimr.cam.ac.uk/static/isolde/doc/tools/ISOLDE.html">https://isolde.cimr.cam.ac.uk/static/isolde/doc/tools/ISOLDE.html</a> |
| UCSF ChimeraX                                        | Goddard, Huang et al. 2018      | <a href="https://www.cgl.ucsf.edu/chimerax/">https://www.cgl.ucsf.edu/chimerax/</a>                                                               |
| PyMOL                                                | Schrödinger, LLC                | <a href="https://pymol.org/2/">https://pymol.org/2/</a>                                                                                           |

501  
502  
503  
504  
505  
506

## RESOURCE AVAILABILITY

### Lead Contact

Further information and requests for resources should be directed to and will be fulfilled by the Lead Contact, Joanna Slusky (slusky@ku.edu).

### Data and materials availability

507 All strains used are commercially available. All plasmids available through Addgene. CryoEM  
508 maps and models have been deposited with accession codes EMD-21960, EMD-21959, PDB ID  
509 6WXI, and PDB ID 6WXH. All other data is available in the main text or the supplementary  
510 materials.

## 511 **METHOD DETAILS**

512 ***E. coli* strains.** *E. coli* strains BW25113 and JW5503-1 were purchased from the Coli Genetic  
513 Stock Center (CGSC). JW5503-1 is a *tolC732(del)::kan* from the parent strain BW25113.  
514 BL21(DE3) were used for expression of the colicin constructs and TolC. BL21(DE3) has a  
515 premature stop codon at residue 58 of the *btuB* gene and therefore we used it as a  $\Delta btuB$  strain  
516 for microscopy.

517  
518 **Expression and Purification.** The gene for *colE1-TR* was synthesized as a gBlock (Integrated  
519 DNA Technologies) and cloned into pET303. Inverse PCR was used to delete the R domain and  
520 produce colicin E1-T. The gene for colicin E1-TR-GFP was produced by inserting GFP at the C  
521 terminus of *colE1-TR*.

522  
523 Plasmids were transformed into *E. coli* BL21(DE3) cells and plated on LB + agar + 100  $\mu\text{g}/\text{mL}$   
524 carbenicillin. Single colonies were inoculated into 50 mL LB broth with 100  $\mu\text{g}/\text{mL}$  carbenicillin  
525 and grown overnight at 37 °C with shaking at 250 r.p.m. Proteins were expressed by inoculating  
526 1L of TB supplemented with 0.4% glycerol, 10 mM  $\text{MgCl}_2$  and 100  $\mu\text{g}/\text{mL}$  carbenicillin with 20  
527 mL of the overnight culture. The culture was grown at 37 °C to an OD600 of 2.0 and induced  
528 with 1 mM IPTG. Expression cultures were then grown at 15 °C for 24 hours and harvested at  
529 4,000 g for 30 minutes at 4 °C. Cell pellets were resuspended at 3 mL/g of cell pellet in lysis  
530 buffer (TBS, 5 mM  $\text{MgCl}_2$ , 10 mM imidazole, 1mM PMSF, 10  $\mu\text{g}/\text{mL}$  DNase, 0.25 mg/mL  
531 lysozyme) and lysed via sonication (2 minutes, 2s on, 8s off, 40% amplitude, QSonica Q500  
532 with 12.7 mm probe) in an ice bath. Lysates were centrifuged at 4,000 g for 10 minutes to  
533 remove un-lysed cells and debris. The supernatant was centrifuged again at 50,400 g in a  
534 Beckman Coulter J2-21 for 1 hour at 4 °C. Clarified lysates were applied to a 5 mL HisTrap FF  
535 column and purified using an ÄKTA FPLC system with a 20 column volume wash step with  
536 binding buffer (TBS, 25 mM imidazole) and eluted using a linear gradient from 0-50% elution  
537 buffer (TBS, 500 mM imidazole) in 10 column volumes. Concentrated proteins were loaded onto  
538 a HiLoad Superdex 16/60 200 pg gel filtration column and eluted into phosphate buffered saline  
539 (PBS) pH 7.4.

540  
541 TolC expression and purification was conducted in the same manner for preparation for cryoEM  
542 and for SEC. The gene for full-length TolC (a generous gift from R. Misra) was cloned into  
543 pTrc99a with the signal sequence deleted for expression into inclusion bodies. Plasmids were  
544 transformed into BL21(DE3) and plated on LB + agar + 100  $\mu\text{g}/\text{mL}$  carbenicillin. A single  
545 colony was picked and grown in LB at 37 °C with shaking at 250 r.p.m. overnight. In the  
546 morning, 1L of LB was inoculated with 20 mL of the overnight culture and grown at 37 °C with  
547 shaking at 250 r.p.m. until the culture reached an OD600 of 0.6, at which point protein  
548 expression was induced with 1mM IPTG for an additional 4 hours. Cells were then harvested at  
549 4,000g for 30 minutes at 4 °C. Cell pellets were resuspended in mL of lysis buffer (TBS, 5 mM  
550  $\text{MgCl}_2$ , 0.2 mg/mL lysozyme, 5  $\mu\text{g}/\text{mL}$  DNase, 1mM PMSF) at 3 mL/1g of cell pellet and lysed  
551 via sonication (4 minutes, 2s on, 8s off, 40% amplitude, QSonica Q500 with 12.7 mm probe) in  
552 an ice bath. Cell lysates were centrifuged at 4,000 g for 30 minutes at 4 °C to harvest inclusion

553 bodies. Inclusion body pellets were resuspended in inclusion body wash buffer (20 mM Tris pH  
554 8.0, 0.5 mM EDTA, 1% Triton X-100) and centrifuged at 4,000g for 30 minutes at 4 °C. The  
555 inclusion body wash was repeated two more times. A final wash was done in 20 mM Tris pH 8.0  
556 and inclusion bodies were stored at -20 °C. Inclusion bodies were solubilized in 20 mM Tris pH  
557 8.0, 8M urea at 500 µM. N-octylpolyoxyethylene was added to 5 mL of solubilized TolC to a  
558 final concentration of 10% detergent and pipetted into a Slide-A-Lyzer G2 dialysis cassette with  
559 a 10,000 molecular weight cut off. Refolding was initiated by dialysis in 5L of 20 mM Tris pH  
560 8.0, 100 mM NaCl at 4 °C with stirring overnight. TolC was centrifuged at 15,200 g for 10  
561 minutes at 4 °C to remove aggregates. The supernatant was filtered through a 0.22 µm filter,  
562 concentrated to 2 mL, applied onto a HiLoad 16/60 Superdex 200 pg column on an ÄKTA Pure  
563 FPLC system, and eluted with 1.5 column volumes in 20 mM Tris pH 8.0, 100 mM NaCl, 0.05%  
564 n-dodecyl-β-D-maltoside. TolC containing fractions were pooled and concentrated to 300 µM in  
565 Amicon centrifugal filters with molecular weight cutoff of 30kDa.

566  
567 Membrane scaffold protein MSP1D1. MSP1D1 in pET28a was purchased from Addgene and  
568 was expressed and purified as previously described<sup>56</sup>.

569  
570 **Peptide Synthesis.** ColE1-T100-143 was synthesized using standard Fmoc chemistry with a  
571 CEM liberty blue microwave peptide synthesizer. The peptides were cleaved using a solution of  
572 92.5:2.5:2.5:2.5 TFA:TIPS:H<sub>2</sub>O:DoDt and the crude peptides were purified using HPLC.  
573 Analytical HPLC traces were acquired using an Agilent 1100 quaternary pump and a Hamilton  
574 PRP-1 (polystyrene-divinylbenzene) reverse phase analytical column (7 µm particle size, 4 mm x  
575 25 cm) with UV detection at 215 nm. The eluents were heated to 45 °C to reduce separation of  
576 rotational isomers, and elution was achieved with gradients of water/ acetonitrile (90:10 to 0:100  
577 containing 0.1% TFA) over 20 min. Low-resolution mass spectra (LRMS) were obtained using a  
578 Waters Micromass ZQ 4000 instrument with ESI+ ionization

579  
580 **Extracellular Protease Digestion.** Protein localization after exogenous protein addition to  
581 whole cells was determined as previously described<sup>38</sup>.

582  
583 **Single-Molecule Microscopy.** Cysteine mutations were introduced at the C-terminus before the  
584 histidine tag for fluorophore conjugation. These constructs were purified as described in the  
585 expression and purification section with the addition of 1 mM TCEP in all buffers. All  
586 subsequent steps were performed with limited exposure to light and in amber tubes. Cyanine3  
587 (Cy3) maleimide (Lumiprobe) was reconstituted in DMSO. Fluorophore labeling was achieved  
588 by mixing a 20-fold molar excess of Cy3 maleimide to protein and incubating overnight at 4 °C.  
589 Free dye was removed by gel filtration on a Sephadex NAP-10 G-25 column. Simultaneously to  
590 the dye removal, the sample was buffer exchanged into storage buffer (PBS pH 7.4, 1 mM DTT,  
591 1 mM EDTA). The degree of labeling was determined spectrophotometrically from the  
592 concentrations of the dye and protein solutions using their respective extinction coefficients, ε, as  
593 described by their manufacturers or for the proteins as estimated by ExPASy ProtParam (Cy3  
594 ε<sub>548nm</sub> = 162,000 L mol<sup>-1</sup> cm<sup>-1</sup>; colE1-T-E192C ε<sub>280nm</sub> = 9,970 L mol<sup>-1</sup> cm<sup>-1</sup>; colE1-TR-  
595 E366C ε<sub>280nm</sub> = 14,440 L mol<sup>-1</sup> cm<sup>-1</sup>). Labeling efficiencies were ~75% and ~85% for colE1-  
596 T-E192C and colE1-TR-E366C, respectively. Protein concentrations were adjusted according to  
597 the percentage of labeled protein.

598

599 Cultures of *E. coli* (WT,  $\Delta$ tolC, or BL21(DE3)) were grown in LB medium at 37 °C with  
600 shaking (180 r.p.m.) overnight, then transferred to MOPS minimal medium (Teknova) with 0.2%  
601 glycerol and 1.32 mM  $K_2HPO_4$ , and grown at 37 °C for 13 h. The sample was transferred to  
602 MOPS medium and grown to turbidity at 37 °C overnight. A 1-mL aliquot of culture was  
603 centrifuged for 2 min at 4,850 g to pellet the cells. The pellet was washed in 1 mL MOPS and  
604 centrifuged a second time. The supernatant was then removed, and the cell pellet was  
605 resuspended in 500  $\mu$ L MOPS. A 1.0  $\mu$ L droplet of concentrated cells was placed onto a glass  
606 slide. Then, a 1.0  $\mu$ L droplet of 1  $\mu$ g/mL colicin E1 protein construct stock was added to the  
607 cells. The droplet was covered by an agarose pad (1% agarose in MOPS media) and a second  
608 coverslip.

609  
610 Samples were imaged at room temperature using wide-field epifluorescence microscopy with  
611 sensitivity to detect single dye molecules as described previously<sup>39</sup>. Briefly, fluorescence was  
612 excited by a 561-nm laser (Coherent Sapphire 560-50) for Cy3 or a 488-nm laser (Coherent  
613 Sapphire 488-50) for GFP. The lasers were operated at low power densities (1 – 2 W/cm<sup>2</sup>), and  
614 fluorescence was imaged with an Olympus IX71 inverted microscope with a 100x, 1.40-NA oil-  
615 immersion objective and appropriate excitation, emission, and dichroic filters. A Photometrics  
616 Evolve electron multiplying charge-coupled device (EMCCD) camera with > 90% quantum  
617 efficiency captured the images at a rate of 20 frames per second. Each detector pixel corresponds  
618 to a 49 nm  $\times$  49 nm area of the sample.

619  
620 **Co-elution.** The interaction of TolC and colicin E1-T or -TR were determined by co-elution on  
621 an SEC column. Purified TolC and colicin E1-T or -TR were mixed at a 1:2 molar ratio and  
622 incubated at room temperature for 1 hour before loading onto a Superdex 200 Increase 10/300  
623 GL column (GE Healthcare). The protein was eluted with 1.5 column volumes into 20 mM Tris  
624 pH 8.0, 40 mM NaCl, 0.05% n-dodecyl- $\beta$ -D-maltoside for colE1-T. For colE1-TR the NaCl  
625 concentration was increased to 200 mM to prevent precipitation. Elution fractions were collected  
626 every 0.5 mL. Peak fractions were concentrated to 20  $\mu$ L and analyzed by 4-20% SDS-PAGE.

627  
628 **Real-Time Efflux.** Real-time efflux activity in the presence of colE1-TR was determined as  
629 previously described with some modifications<sup>46,47</sup>. Cells were resuspended to OD<sub>600</sub> 1.5 in cold  
630 PBS with and without 10-100  $\mu$ M colicin proteins and incubated for 15 minutes on ice. To turn  
631 off efflux, 100 $\mu$ M carbonyl cyanide m-chlorophenyl hydrazone (CCCP) was added. After an  
632 additional 15 minutes the efflux dye NNN was added to the cells to 10  $\mu$ M. The cells were  
633 incubated at 25 °C with shaking at 140 r.p.m. for 2 hours. Cells were harvested at 3,500 g for 5  
634 minutes and washed once in 20 mM potassium phosphate buffer pH 7 with 1mM  $MgCl_2$ . Cell  
635 concentrations were adjusted to OD<sub>600</sub> 1.0 and placed on ice. Then, 2 mL of the cell suspension  
636 was loaded into a quartz cuvette (Agilent Technologies). Fluorescence was measured with an  
637 Agilent Cary Eclipse fluorescence spectrophotometer with slit widths at 5 and 10 nm for  
638 excitation wavelength of 370 nm and emission wavelength of 415 nm. Fluorescence  
639 measurements were taken every 1 second. After 100 seconds, 50 mM glucose was added to re-  
640 energize the cells and initiate efflux, and fluorescence data were collected for an additional 600  
641 seconds.

642  
643 **Minimum Inhibitory Concentrations (MICs).** MICs were determined using the broth dilution  
644 method<sup>57</sup> with some modifications in 96 well plate format using LB media in 100  $\mu$ L well

645 volumes. Cultures were grown at 37 °C with shaking at 250 r.p.m. and OD600 was read on a  
646 Biotek plate reader after 20 hours. MICs are defined by the lowest concentration that prevents  
647 visible growth. We chose an OD600 of >0.1 as the cutoff for growth. We report MICs as the  
648 mean of 3 or 6 biological replicates with each replicate plotted (Figure 3D, Table S2). Due to the  
649 2-fold discretized nature of concentration ranges used to determine MICs we do not report  
650 statistical significance values as is typical of MIC reporting.

651  
652 **Reconstitution of TolC into Amphipol.** Amphipol A8-35 (Anatrace) was solubilized in water at  
653 33 mgs/mL. 1 mL of TolC at 0.5 mg/mL was mixed with 0.75  $\mu$ L of A8-35 at 33 mg/mL for a 5-  
654 fold weight excess and incubated at room temperature for 30 minutes. Bio-Beads SM-2 resin that  
655 was washed in methanol and equilibrated with 20 mM Tris, 40 mM NaCl was added to the  
656 reaction mixture at 0.5 g/mL to initiate detergent exchange for A8-35 and incubated with rotation  
657 at 4 °C overnight. The mixture was transferred to a tube with fresh Bio-Beads and incubated at 4  
658 °C for an additional 4 hours. The reaction mixture was loaded onto a HiLoad 16/60 Superdex  
659 200 pg column on an ÄKTA Pure FPLC system and eluted with 1.5 column volumes in 20 mM  
660 Tris pH 8.0, 40 mM NaCl to remove free A8-35 and detergent. For colicin-bound TolC in A8-35,  
661 colicin E1-T was added to the reaction mixture at a >2 molar excess prior to gel filtration. TolC  
662 or colicin-bound TolC in A8-35 was concentrated to 2-4 mg/mL for cryoEM.

663  
664 **Reconstitution of TolC into lipid nanodiscs.** POPC (Avanti Polar Lipids) in chloroform was  
665 dried under a stream of nitrogen and freeze dried to remove residual chloroform. Lipids were  
666 reconstituted to 50 mM in cholate buffer (20 mM Tris pH 8.0, 100 mM NaCl, 0.5 mM EDTA,  
667 100 mM cholate) in an amber glass vial. The vial was submerged under a stream of warm water  
668 until the solution became clear. Lipids, membrane scaffold protein, and TolC were mixed in a  
669 36:1:0.4 ratio as previously described<sup>58</sup>. Final concentrations were 4.5 mM POPC, 125  $\mu$ M  
670 MSP1D1, 50  $\mu$ M TolC in a 2 mL reaction with cholate brought up to 20 mM and dodecyl-  
671 maltoside up to 0.1%. The reaction mixture was incubated on ice for 1 hour. Bio-Beads SM-2  
672 resin that was washed in methanol and equilibrated with 20 mM Tris, 40 mM NaCl were added  
673 to the reaction mixture at 0.5 g/mL to initiate nanodisc formation and incubated with rotation at  
674 4°C overnight. The mixture was transferred to a tube with fresh Bio-Beads and incubated at 4 °C  
675 for an additional 4 hours. The reaction mixture was loaded onto a HiLoad 16/60 Superdex 200  
676 pg column on an ÄKTA Pure FPLC system and eluted with 1.5 column volumes in 20 mM Tris  
677 pH 8.0, 40 mM NaCl to separate TolC inserted into nanodiscs from empty nanodiscs. For  
678 colicin-bound TolC in nanodiscs, colicin E1-T was added to the reaction mixture at a >2 molar  
679 excess prior to gel filtration. TolC or colicin-bound TolC in nanodiscs was concentrated to 2-4  
680 mg/mL for cryoEM.

681  
682 **Cryoelectron microscopy.** 3  $\mu$ L of protein solution (TolC/colE1-T in amphipol or TolC/colE1-T  
683 in nanodiscs) was diluted to approximately 1.05 mg/mL concentration, applied to a glow-  
684 discharged TEM grid, and plunge-frozen in ethane using a Vitrobot Mark IV (FEI Company)  
685 with grade 595 filter paper (Ted Pella). Glow discharge was performed in ambient atmosphere at  
686 0.39 mBar pressure. Imaging was performed using a Talos Arctica (FEI Company) operated at  
687 200 kV with energy-filter and K2 Summit (Gatan, Inc.) for detection. To collect multiple images  
688 per hole while maintaining parallel illumination conditions, a nonstandard 20  $\mu$ m condenser  
689 aperture was used to image TolC-colE1-T in nanodiscs. At nominal magnification of 205,000 $\times$ ,  
690 images were acquired in counting mode with a calibrated pixel size of 0.6578 Å. Fresnel fringes



691 attributable to the beam interaction with the aperture were often seen in images. Some  
692 investigators have moved the microscope stage and altered the nominal objective lens true focus  
693 point to generate a fringe-free condition<sup>59</sup>. In this study, imaging at 205,000× with a 20 μm  
694 aperture yielded better results than imaging at 130,000× with a 50 μm aperture; at 130,000× with  
695 a 20 μm aperture the fringes were extremely severe due to the larger field of view, so a full  
696 dataset was not collected with those conditions. TolC in nanodiscs (without colE1-T) was  
697 imaged at 130,000× with a 50μm condenser aperture (Table S1).

698  
699 Micrographs were collected with SerialEM<sup>60</sup> using in-house modifications of the scripts of Chen  
700 Xu (sphinx-emdocs.readthedocs.io). Briefly, multishot imaging was configured with 4 images  
701 per hole for each of 16 holes; intermediate-magnification montages of grid squares were  
702 acquired; points were selected manually for collection of 64 images per point; images were  
703 acquired using coma-compensated image shift as gain- and dark-corrected LZW-compressed  
704 TIFs. Side, top, and oblique views were seen in areas of thin ice. During screening, ice thickness  
705 was estimated at 17-30nm by the method of  $I_0/I_{ZLP}$ <sup>61</sup>.

706  
707 The collection of micrographs of TolC without colicin at 130,000× magnification has been  
708 previously described<sup>62</sup>.

709  
710 **3D reconstruction and modeling.** Final reconstructions were obtained using cryoSPARC 2<sup>63</sup>.  
711 1,018 micrographs were collected of amphipol-embedded TolC/colE1-T. Micrographs were  
712 motion-corrected using RELION 3<sup>64</sup>. CTF parameters were determined by means of *ctffind*<sup>65</sup>.  
713 115,362 particles were selected with crYOLO<sup>66</sup>. 2D classification revealed that many particles  
714 had aberrant morphology and only 24,624 (21%) were selected for 3D reconstruction. *Ab initio*  
715 reconstruction in cryoSPARC 2<sup>63</sup> was effective at recovering a map whose shape was similar to  
716 that of previously described TolC trimers. However, the data could only be refined to a nominal  
717 global resolution of 6.0 Å, and luminal density was insufficiently resolved. 4,492 micrographs  
718 were then collected of nanodisc-embedded TolC/colE1-T and processed similarly. Of the  
719 339,779 particles detected by cryoSPARC Live, 179,834 (53%) were in good classes. Although  
720 there were slightly fewer particles per micrograph in the nanodisc dataset, more particles per  
721 micrograph were usable. Beginning with the *ab initio* model and mask derived from the  
722 amphipol data, this particle set was refined by cryoSPARC 2 non-uniform refinement with or  
723 without imposed  $C_3$  symmetry. The maps refined to nominal global resolutions of 2.81 Å and  
724 3.09 Å for the symmetrized and asymmetric maps, respectively. There was local variation in  
725 resolution within the map, with consistent, high resolution in the middle of TolC and lower  
726 resolution at the lids and for colE1-T. Local resolution was computed in cryoSPARC by the  
727 locally windowed FSC method<sup>67</sup> and rendered with UCSF Chimera. To reduce the voxel-based  
728 values to averages for four regions of the complex, the local resolution map was masked to  
729 include only voxels within 3 Å of a modeled atom and then the median value was calculated for  
730 those voxels closest to colE1, closest to TolC residues 168-172 and 386-390, closest to TolC  
731 residues 285-301 and 76-82, or closest to other TolC residues. Furthermore, it is notable that  
732 while the nanodisc appears as a double-belt in the symmetrized map, in the asymmetric map the  
733 nanodisc protein mostly appears on the side of TolC that is bound to colE1-T. One possible  
734 explanation is that, despite masking, nanodisc asymmetry is a confounder of the asymmetric  
735 refinement and is one source of heterogeneity in the data. Another possibility is that the C-

736 terminus of colE1-T forms an interaction with the nanodisc, causing preferential alignment of the  
737 nanodisc with respect to the TolC/colE1-T complex.

738  
739 196,158 particles of TolC without colicin were obtained as previously described<sup>62</sup>.  
740 Homogeneous refinement yielded a structure at 2.89 Å; local motion correction and global CTF  
741 refinement yielded a final map at 2.84 Å.

742  
743 Modeling was initiated by rigidly docking a crystal structure of TolC in complex with  
744 hexammincobalt (1TQQ)<sup>30</sup> into the symmetrized map density. Automated, semi-automated, and  
745 manual real-space refinement was performed using phenix<sup>68</sup>, ISOLDE<sup>69</sup>, and coot<sup>70</sup>. For TolC  
746 with colE1-T, additional refinement was performed in AMBER using the cryoEM density map  
747 as a restraint.

748  
749 Although additional residues are present at the TolC C-terminus, these were not modeled  
750 because the density becomes unsharp after residue 428. Blurred density in the map suggests that  
751 the C-terminus follows helix 3 towards the periplasmic end of the molecule. ColE1-T was  
752 modeled *ab initio*. The 3-fold symmetrized map contains density at ~1/3<sup>rd</sup> occupancy for colE1-T  
753 and this density contains some high-resolution information not present in the asymmetric map,  
754 except near the TolC lid regions where symmetrization overlays colE1-T density with TolC  
755 density at a threefold-related position. First, polyalanine helices were placed in the helical  
756 density in coot. Cross-correlation coefficients for both helices are higher with the N-terminus  
757 oriented towards the periplasm, and the Christmas tree appearance was observed indicating that  
758 this is the correct chain orientation. An estimate of the registration was made by visual inspection  
759 of potential anchor residues. Finally, the hinge region was filled in using phenix and coot. This  
760 completed chain was refined against the asymmetric map in ISOLDE. Iteration between phenix,  
761 coot, and ISOLDE was continued until acceptable fit to density was achieved. In the case of  
762 TolC with colE1-T, the map was further improved by combining map information with  
763 molecular dynamics force fields<sup>33</sup>. Briefly, starting with the phenix/coot/ISOLDE-refined model,  
764 we performed restrained simulated annealing in AMBER, heating from 0K to 300K for 0.2 nsec,  
765 holding constant temperature for 1 nsec, and then cooling to 0K over 0.2 nsec. The cryoEM  
766 density map is utilized as a restraint potential in the annealing so that both map information and  
767 AMBER force field information are simultaneously utilized to obtain an optimum model  
768 consistent with the data<sup>33</sup>. The protein force field used the ff14SB force field<sup>71</sup> and a generalized  
769 Born implicit solvent model with  $igb=8$ <sup>72</sup>, and a nonbonded cutoff of 20 Å. The relative weight  
770 of real-space map-based restraints and the force field was fixed using  $fcons=0.02$ . For colE1-T,  
771 information from the symmetrized map was integrated into the modeling procedure during  
772 manual remodeling in coot, but map-based refinement in phenix, ISOLDE, and AMBER were  
773 against the asymmetric map. TolC without colE1-T was modeled similarly but using the TolC-  
774 colE1-T structure as a starting point instead of 1TQQ, and without final AMBER refinement.

775  
776 Molecular representations were generated with Chimera, ChimeraX<sup>73</sup> or PyMOL (Schrödinger,  
777 LLC).

778



779

780

## **Supplemental Information**

781

782

783

### **Colicin E1 binds to TolC as an open hinge to penetrate the outer-membrane**

784

785

S. Jimmy Budiardjo, Jacqueline J. Stevens, Anna L. Calkins, Ayotunde P. Ikujuni, Virangika K.

786

Wimalasena, Emre Firlar, David A. Case, Julie S. Biteen, Jason T. Kaelber and Joanna S.G.

787

Slusky

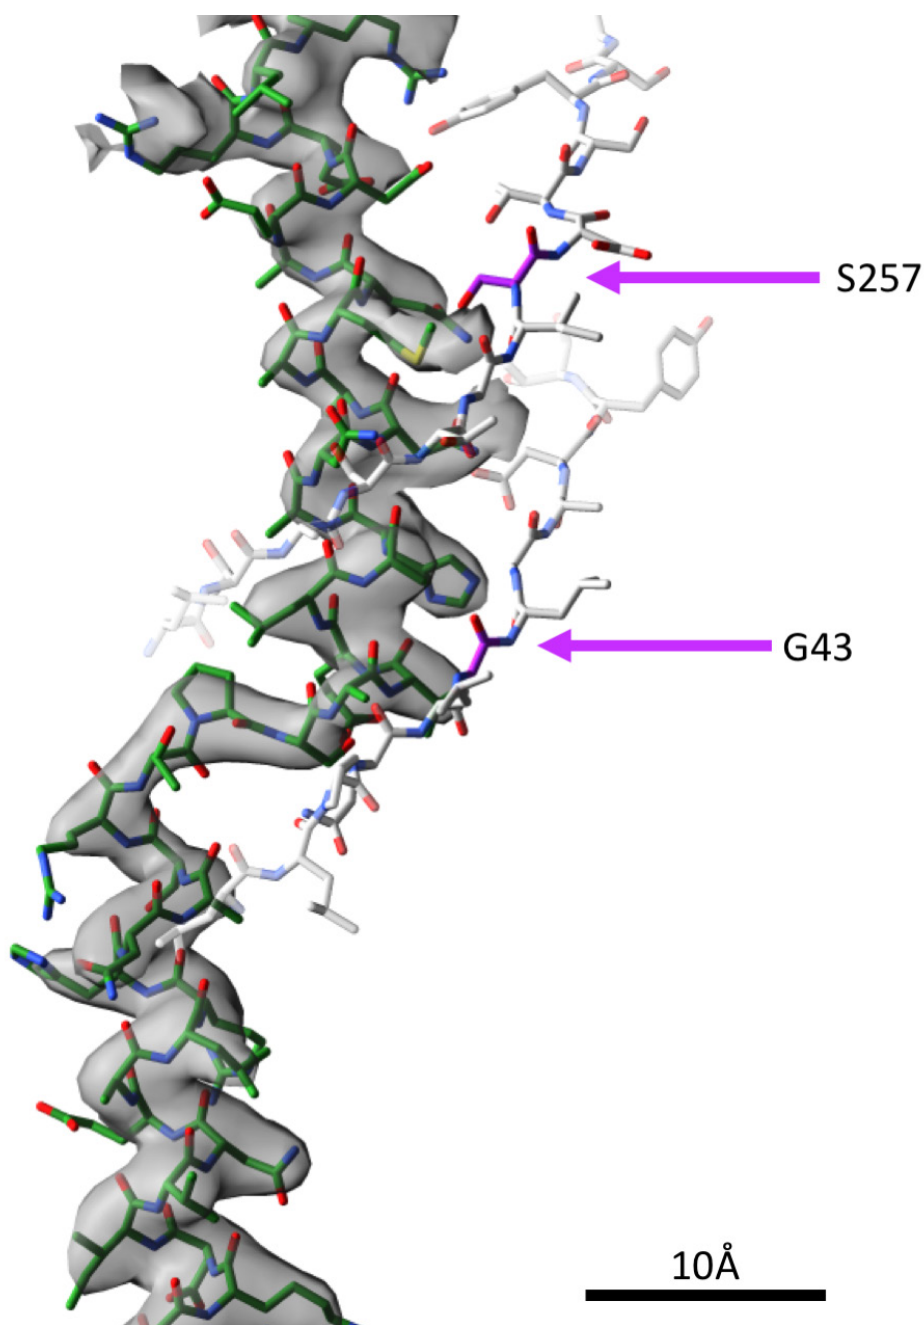

788  
789  
790  
791  
792  
793  
794  
795

**Figure S1. TolC box density** cropped from the fully asymmetric cryoEM map of the TolC/colE1-T complex. Mutations at positions G43 and S257 in the TolC (grey sticks) barrel make direct contact with colE1-T (green). These mutations were previously shown to abolish WT colE1 function<sup>36</sup>. Mutations to bulkier side chains introduce a steric clash that prevents binding.

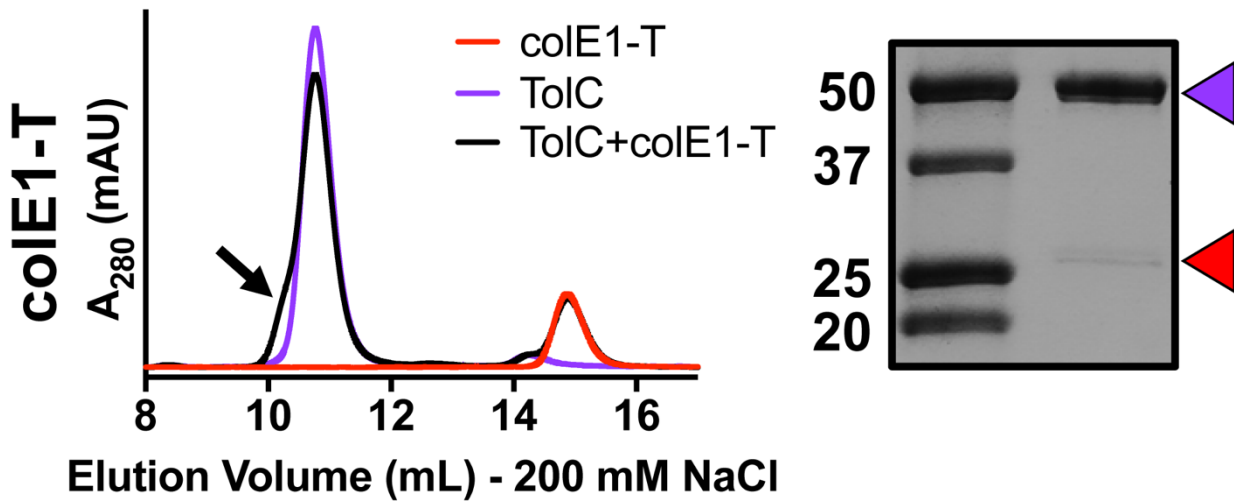

796

797 **Figure S2. Co-elution of colE1-T with TolC at 200 mM NaCl (black).** Under this higher salt  
798 concentration, when TolC (purple) and colE1-T (red) are mixed, there is a smaller peak shift than  
799 that seen with colE1-TR and the presence of a shoulder (black arrow). SDS-PAGE of the  
800 shoulder shows presence of both TolC (purple arrow) and colE1-T (red arrow). Although some  
801 binding was detected, this higher salt concentration prevents full binding as indicated by a much  
802 fainter band for colE1-T than seen at the lower salt concentration (Figure 4A).

803

804

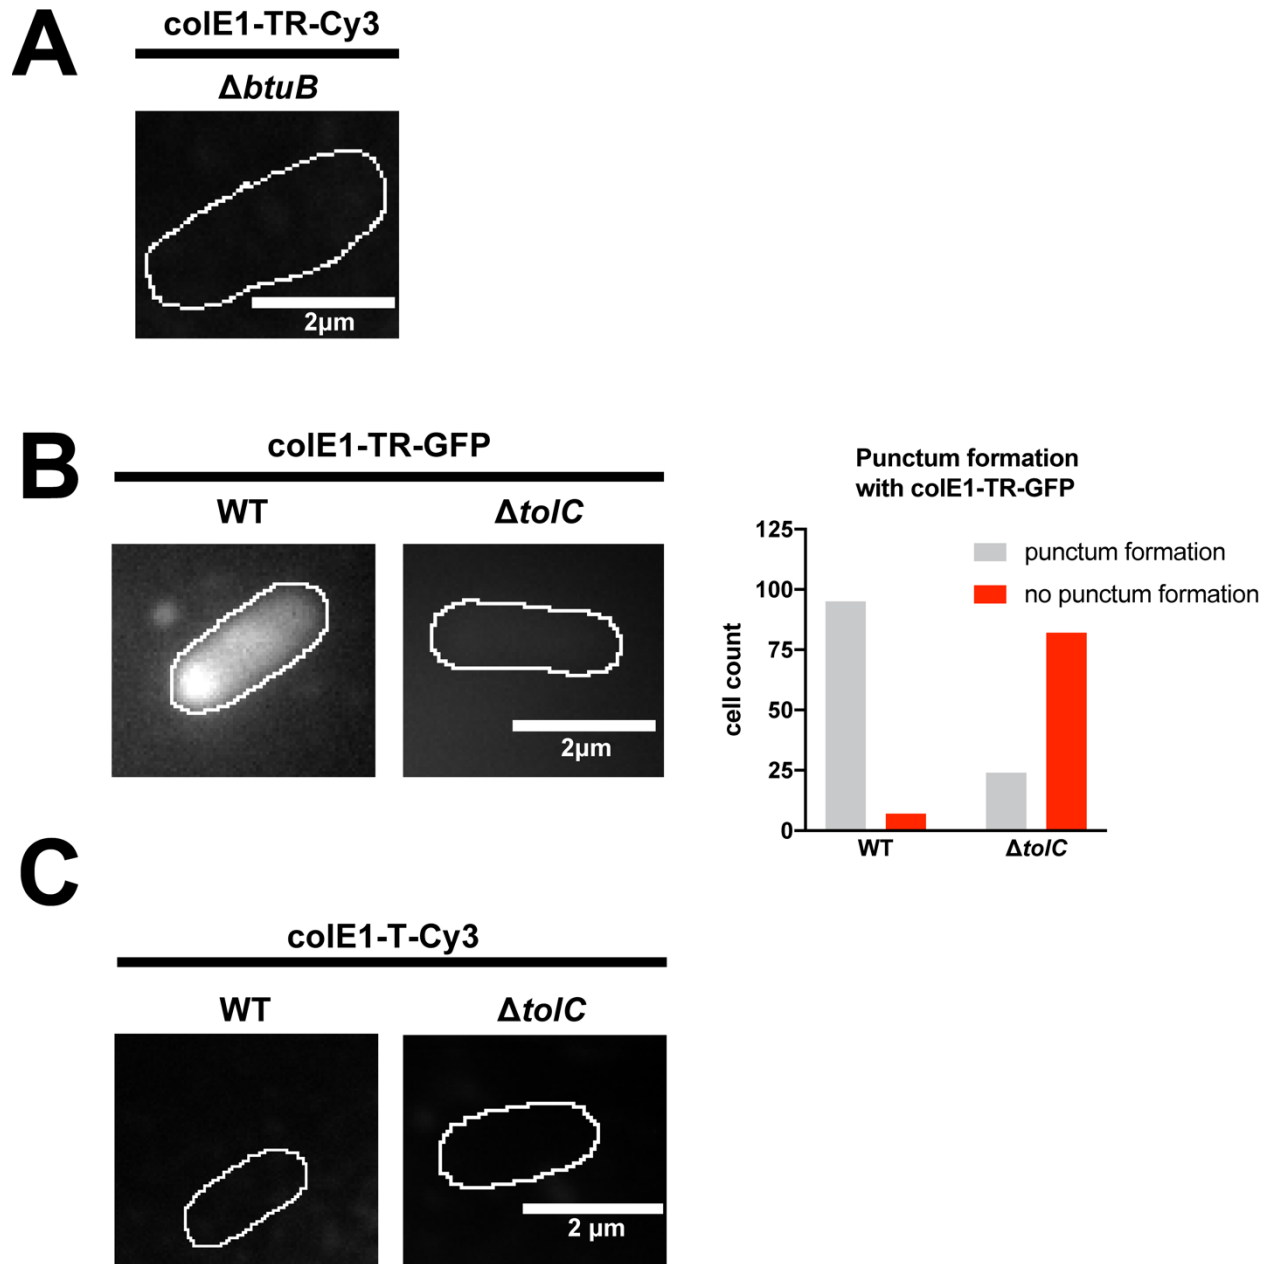

805  
806 **Figure S3 Single-molecule microscopy.** Fluorescence images overlaid on outlines of living *E.*  
807 *coli* cells from phase-contrast microscopy for WT and  $\Delta tolC$  for colE1-TR-GFP and counts of  
808 cells where colE1-TR-GFP punctum formation was observed. (A) 97% of cells showed no  
809 binding of Cy3-labeled colE1-TR to  $\Delta btuB$  (B) ColE1-TR-GFP forms similar puncta as Cy3-  
810 labeled ColE1-TR (main text Figure 4C). (C) No binding of Cy3-labeled colE1-T to WT or  
811  $\Delta tolC$  cells was detected with Cy3-labeled colE1-T. Scale bars: 2  $\mu$ m.  
812  
813  
814  
815  
816  
817

818  
819

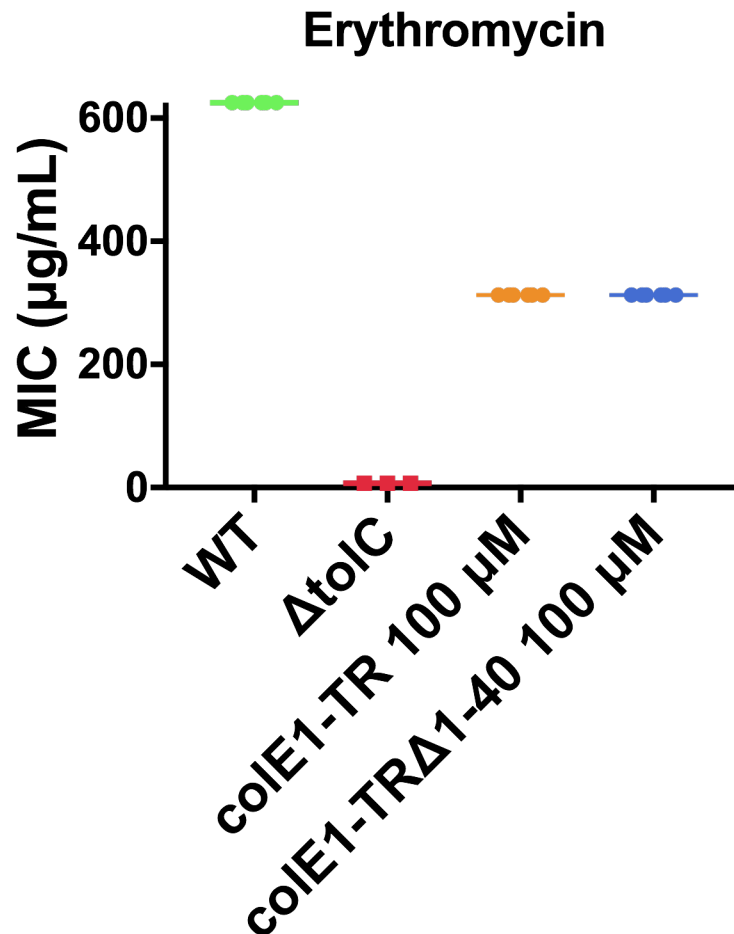

820

821

822 **Figure S4. Minimum Inhibitory Concentration of Erythromycin with colE1-TR TolA box**  
823 **deletion construct.** The MIC for erythromycin with 100 μM colE1-TR or colE1-TR<sub>Δ1-40</sub> is  
824 identical indicating that TolA engagement by colE1-TR does not contribute to antibiotic  
825 susceptibility.

826

827

828

829

830 **Table S1**  
 831 Cryo-EM data collection, refinement, and validation statistics

832

|                                        | TolC<br>(EMDB-21960)<br>(PDB 6WXI) | TolC + colE1<br>(EMDB-21959)<br>(PDB 6WXH) |
|----------------------------------------|------------------------------------|--------------------------------------------|
| <b>Data collection and processing</b>  |                                    |                                            |
| Electron microscope                    | Talos Arctica                      | Talos Arctica                              |
| Magnification                          | 130,000×                           | 205,000×                                   |
| Voltage (kV)                           | 200                                | 200                                        |
| Electron exposure (e-/Å <sup>2</sup> ) | 33.04                              | 35.96                                      |
| Defocus range (μm)                     | 0.5-2.6                            | 0.4-2.1                                    |
| Pixel size (Å)                         | 1.038                              | 0.6578                                     |
| Symmetry imposed                       | C <sub>3</sub>                     | C <sub>1</sub> (C <sub>3</sub> )           |
| Initial particle images (no.)          | 2,092,678                          | 339,779                                    |
| Final particle images (no.)            | 778,220                            | 179,834                                    |
| Map resolution (Å)                     | 2.84                               | 3.09 (2.81)                                |
| FSC threshold                          | 0.143                              | 0.143                                      |
| <b>Refinement</b>                      |                                    |                                            |
| Initial model used (PDB code)          | 6WXH                               | 1TQQ                                       |
| Model resolution (Å)                   | 3.11                               | 3.37                                       |
| FSC threshold                          | 0.5                                | 0.5                                        |
| R.m.s. deviations                      |                                    |                                            |
| Bond lengths (Å)                       | 0.0072                             | 0.012                                      |
| Bond angles (°)                        | 1.11                               | 1.76                                       |
| Validation                             |                                    |                                            |
| MolProbity score                       | 1.33                               | 0.50                                       |
| Clashscore                             | 4.42                               | 0.00                                       |
| Poor rotamers (%)                      | 1.40                               | 0.18                                       |
| Ramachandran plot                      |                                    |                                            |
| Favored (%)                            | 98.12                              | 98.31                                      |
| Allowed (%)                            | 1.88                               | 1.32                                       |
| Disallowed (%)                         | 0                                  | 0.37                                       |

833

834

835 **Table S2.**  
836 Mean minimum inhibitory concentrations (MICs) of antimicrobials in the presence of colE1-TR.

837

---

|                                       | Erythromycin<br>( $\mu\text{g/mL}$ ) | Ciprofloxacin<br>( $\text{ng/mL}$ ) | Kanamycin<br>( $\mu\text{g/mL}$ ) | Benzalkonium<br>Chloride<br>( $\mu\text{g/mL}$ ) |
|---------------------------------------|--------------------------------------|-------------------------------------|-----------------------------------|--------------------------------------------------|
| WT                                    | <b>625.00</b>                        | <b>56.25</b>                        | <b>21.88</b>                      | <b>45.83</b>                                     |
| <i><math>\Delta\text{tolC}</math></i> | <b>7.03</b>                          | <b>15.63</b>                        | <b>NA</b>                         | <b>6.88</b>                                      |
| WT + 10 $\mu\text{M}$ colE1-TR        | <b>364.58</b>                        | <b>75.00</b>                        | <b>28.14</b>                      | <b>25</b>                                        |
| WT + 100 $\mu\text{M}$ colE1-TR       | <b>312.50</b>                        | <b>28.13</b>                        | <b>6.25</b>                       | <b>6.25</b>                                      |

---

838

839



840  
841  
842  
843  
844  
845  
846

**Movie S1.**

A representative 8-second clip of colE1-TR bound to a live cell. ColE1-TR localizes on, and remains bound to, the extracellular surface of *E. coli*. Fluorescence movie of Cy3-labeled colE1-TR on living WT *E. coli* overlaid on outline of the *E. coli* cell from phase-contrast microscopy. Continuous imaging at 25 frames per second. Scale bar: 2  $\mu\text{m}$ .
